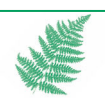

## Quantitative botanical diversity descriptors to set conservation priorities in Bakhuis Mountains rainforest, Suriname

BRUNO G. BORDENAVE<sup>1\*</sup>, JEAN-JACQUES DE GRANVILLE<sup>2</sup> and KATE STEYN<sup>3</sup>

<sup>1</sup>*BGB Consultance – Tropical Botany, 9 Route des Grandes Roches, 29910 Trégunc, France*

<sup>2</sup>*IRD – Herbier de Guyane, Route de Montabo – BP165 – 97323 Cayenne Cedex – Guyane*

<sup>3</sup>*SRK Consulting, Cape Town, 183 Main Road, Albion Springs 7700 Rondebosch, South Africa*

*Received 6 January 2011; revised 6 May 2011; accepted for publication 10 June 2011*

Within the framework of a flora and vegetation study carried out in the Bakhuis Mountains in Suriname, South America, descriptors of plant species and habitat biodiversity were used to set local-scale botanical conservation priorities. Species' diversity and habitat heterogeneity indices, relative scarcity, fragility indices for habitats and ratios of species of concern, such as rare, endemic or subendemic taxa, were processed through a multi-criteria analysis to determine a conservation priority index. One of the main objectives of the study was the setting of defensible conservation priorities at a local and regional scale. Results are discussed, with a focus on land use planning and biodiversity conservation in one of the three major evergreen rainforest regions in the world. Among the 13 vegetation types described in the study perimeter, two that were restricted in area were considered to be of higher concern for wildlife conservation: meso-xeric dwarf thickets found on latero-bauxitic hardcap hilltops, with a distinctive floristic composition, and *Buxus citrifolia* mesic forest patches, described for the first time in Suriname. © 2011 The Linnean Society of London, *Botanical Journal of the Linnean Society*, 2011, **167**, 94–130.

**ADDITIONAL KEYWORDS:** biodiversity – *Buxus citrifolia* – meso-xeric thickets – quantitative analysis – vascular plants – vegetation.

### INTRODUCTION

Setting conservation priorities in a vegetation mosaic as complex and remote as an evergreen rainforest is both essential and a great challenge. An adequate knowledge of each of the ecosystem components is necessary to enable comparison and ranking of the various habitats for conservation planning purposes. Traditional field methods can be employed to assess vegetation typology, species' composition, distribution and scarcity, species' and habitat diversity and structural characteristics to inform this ranking. However, when the study area is large and inaccessible, field results must be interpolated over the entire study area, and this requires the application of more interpretative techniques. Furthermore, a comparison of

data at a regional scale is required to inform conservation planning, but this is limited by the heterogeneity of available datasets from other sites. The characterization of the vegetation and floristics that was undertaken as part of an Environment and Social Impact Assessment of a potential bauxite mining project in Suriname provided a unique opportunity to carry out this research.

Extensive field surveys were undertaken to provide relevant baseline information for the prediction and management of the potential impact of bauxite mining over the largely unstudied area in the Bakhuis Mountains, Suriname. This required the characterization of the diversity of forest habitats and the determination of the species' diversity and sensitivity of the terrestrial vegetation over an extensive area using standard analyses. However, the challenge arose in determining how to contextualize this information in a regional conservation framework. A

\*Corresponding author. E-mail: bruno.bordenave@wanadoo.fr

multi-criteria analysis tool was required to enable a comparative assessment and ranking of conservation priorities at the regional scale; both the different habitats and the sensitivity of vegetation types distinguished at a local scale had to be taken into account.

A typology was proposed to distinguish the vegetation types observed in the study perimeter. Each vegetation type was characterized by the forest structure analysed through the population density and dimensions of the trees and woody climbers. Several quantitative and semi-quantitative indicators of species' and habitat biodiversity were proposed: (1) species' diversity and habitat heterogeneity indices; (2) ratio of species considered to be of concern for conservation; (3) habitat scarcity index; (4) habitat vulnerability index; and (5) ratio of monocotyledons to dicotyledons, the latter being paraphyletic. These indicators enabled an overall evaluation to be made of conservation importance, comparing these vegetation types through a unique multi-factor index combining them. One of the most important objectives of the study was the setting of defensible conservation priorities at local and regional scales.

## MATERIAL AND METHODS

### REGIONAL CONTEXT OF THE STUDY AREA

The Guiana Shield covers approximately 2.5 million km<sup>2</sup> in the north-east of South America. The Shield is bordered by the Orinoco, Rio Negro and Amazon Rivers and lies between 4°S/11°N and 48°E/58°W. The Guiana Shield thus comprises the Venezuelan regions south and east to the Orinoco River (Bolívar, Amazonas and Delta Amaruco States), the part of Brazil north of the Rio Negro and Amazon Rivers (Amapá, Roraima, northern Pará and Amazonas), eastern Colombia and an area referred to as 'the Guianas': Guyana (231 800 km<sup>2</sup>), Suriname (173 840 km<sup>2</sup>) and French Guiana (Guyane) (84 000 km<sup>2</sup>). Harbouring over 15 000 vascular plant species, approximately one-third of which are endemic, the Guianas are considered to be one of the three major tropical wilderness eco-regions in the world (Mittermeier *et al.*, 1990).

The Guianas region is characterized by its Precambrian bedrock, the Guiana Shield itself. In the upland interior, this bedrock formed a peneplain. The peneplain is largely eroded, with fragments of residual laterite hardcaps forming tabular hills and mountains. These hills and mountains are eroded and incised by the hydrographic network and are sometimes covered by detrital crystalline materials, such as white sands, which harbour dry forests and savanna vegetation. In the lower lying coastal plain,

Quaternary marine alluvia overlie the bedrock where it dips downwards. At a regional scale, the highest peaks are sandstone formations, such as the Roraima plateaus shared by Brazil, Guyana and Venezuela, the Pakaraima Mountains in Guyana, Tafelberg in Suriname and the tepuis in Venezuela (de Granville, 1991).

The vegetation of the Guiana Shield is composed of a patchwork of natural and anthropogenic ecosystems (forest, swamps, savannas and agriculture), with evergreen tropical rainforests covering the vast majority of the territory: the forest continuum in the Shield constitutes 25% of the remaining rainforests worldwide. The main vegetation types encountered in the Guiana Shield can be listed as follows, according to Lindeman & Mori (1989): strand vegetation (beach vegetation), mangrove, savanna, herbaceous swamp, swamp forest, marsh forest, seasonal evergreen forest (or seasonal wet forest), mountain vegetation and inselberg (granite outcrop) vegetation.

Suriname can be divided into three main geomorphological areas. The Coastal Plain is a strip of land along the coast, 50–70 km wide, lying 0–11 m above mean sea level (amsl). This area is differentiated into the 'Young Coastal Plain' (Demerara Formation), consisting largely of swampy, clay alluvial deposits, and the 'Old Coastal Plain' (Coropina Formation), consisting of swampy clays and sand ridges of marine and river origin. Mangroves cover the saltwater and brackish areas near the coastline, and are gradually replaced inland by fresh water swamps and shrub vegetation, followed by different types of herbaceous swamps, swamp forest and mesic forest on well-drained ground.

The Savanna Belt (Zanderij Formation) is situated at about 10 m amsl. This area is characterized by poor sandy soils with variable clay content, covered by shrub savannas, xeric to mesic forest and, in places, swamp forest and herbaceous swamp vegetation.

The Interior, covering some 85% of the country, consists of alternating hills and lowlands and low to medium mountains (reaching 1230 m at Juliana Top, the highest point), mostly covered by pristine evergreen tropical rainforests (FAO, 1996). The Bakhuis study area is located in the Interior (Fig. 1).

Low population pressure has contributed to the impressive record of Suriname of having among the highest proportions of intact natural forest (> 80%) compared with other tropical countries. The forests form a continuum with those of neighbouring Guyana and French Guiana, which are also largely undisturbed. There is a large overlap between the Surinamese flora and those of its neighbouring countries and, although there is a low rate of endemism in the country itself, endemism is much more significant at

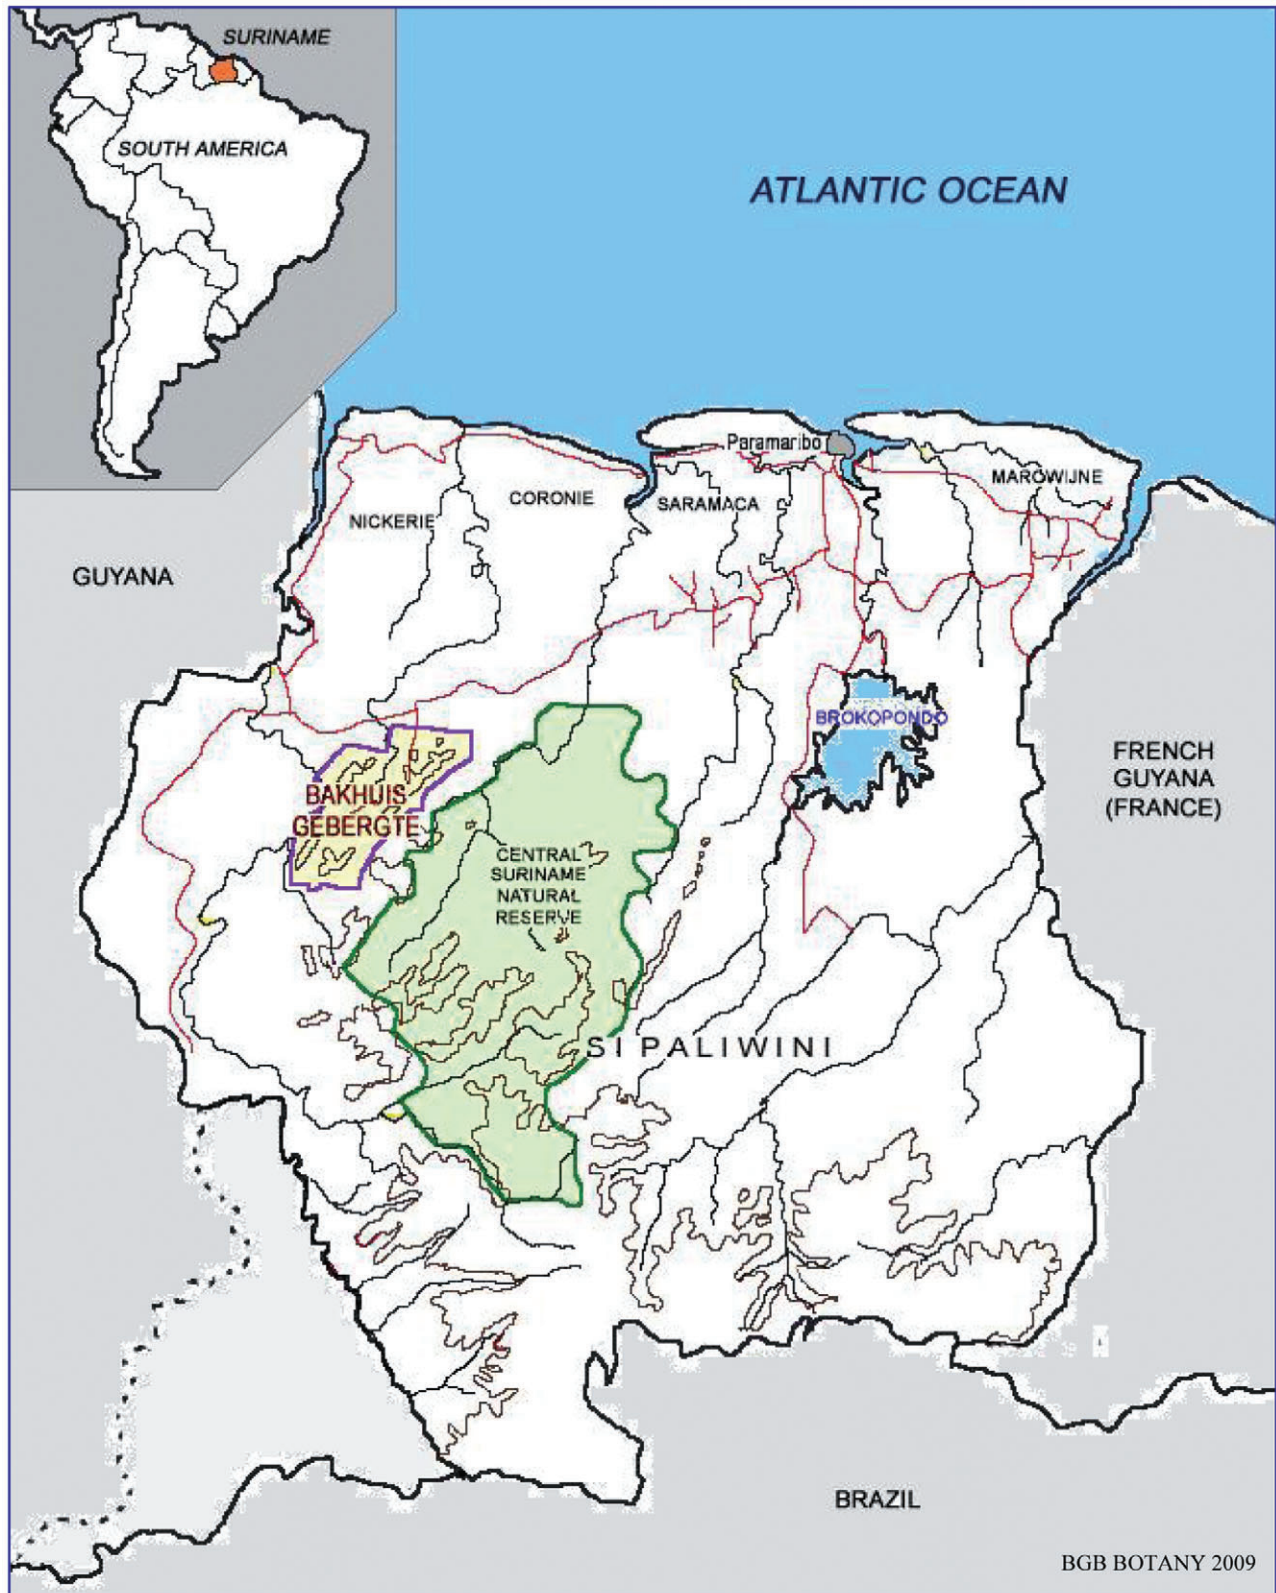

**Figure 1.** Map of Suriname with the location of the Bakhuis Mountains Bauxite Exploration Concession and Central Suriname Natural Reserve.



the Guiana Shield regional scale (35%). In addition to the Bakhuis Mountains area, other ironstone and laterite-capped hills occur in the north-eastern and central parts of Suriname in the Brownsberg, Nassau and Lely Mountains and in the south-central parts of the country, to the west of Juliana Top and in the Kayser and Eilerts de Haan Mountains. Significant botanical data are available for Brownsberg, Lely and Nassau, but only limited and fragmentary knowledge exists for the southern regions. The Central Suriname Natural Reserve (CSNR) was declared in 1998 and was recognized as a World Heritage Site by the UNESCO World Heritage Committee in 2000. At its nearest point, the western boundary of the CSNR lies approximately 15 km east of the Bakhuis study area. Covering some 1.6 million ha, the reserve comprises a vast tract of undisturbed tropical rainforest, encompassing a variety of ecosystems, including the upper watershed of the Coppename River. Its forests harbour a high diversity of plant and animal life, and the CSNR represents one of the largest protected areas of undisturbed, uninhabited primary forest in the tropics. As a result of the enormous size of the reserve and difficult access, a characterization of the vegetation types and a detailed floristic inventory have yet to be carried out in the reserve.

#### LOCAL CONTEXT OF THE STUDY AREA

The study area extends over almost 2800 km<sup>2</sup>, representing approximately one-third of the Bakhuis Mountain range. The Bakhuis Mountains reach an elevation of 1000 m amsl in the most southerly extent, but are generally characterized by a series of hills and plateaus that reach a maximum elevation of 500 m amsl, interspersed with steep valleys and a few larger plains. Almost the entire area is covered with primary tropical rainforest. Except for the main track and network of secondary roads and exploration lines within the exploration concession area, the area is mostly inaccessible.

The first recorded botanical survey undertaken in the northern section of the Bakhuis Mountains was led by Maas and Florchultz in 1964–65 with vouchers housed at Utrecht University, now transferred to the Leiden Herbarium. Several specimens are cited in the *Flora of Suriname* (Pulle *et al.*, 1932–1984) and in the first issues of the *Flora of the Guianas* (Görts-van Rijn *et al.*, 1985–2009). The lowlands in the northern and north-western areas of the Bakhuis Mountains were surveyed during the 1970s as part of the development of the Bakhuis–Apoera railroad, increasing the knowledge of the vegetation and flora between the Kabalebo area and the upper Nickerie River (Maas, 1971; FAO, 1996) and along the railroad track. The Suriname State Forest Service (SBB) carried out a

commercial timber inventory in 1985 in the north of the Bakhuis Mountains, with limited available quantitative data. Orchid collections were also made in the area with specimens housed at the BBS National Herbarium of Suriname (Werkhoven, 1986). In 1994, Teunissen & Van Troon studied the canopy trees in the northernmost area of the concession.

The main vegetation in the concession can be broadly described as follows:

*Inundated forests* ('wetland forest' or 'forest on hydro-morphic ground'): *marsh forest* on temporarily or seasonally flooded soil and *swamp forest* on permanently inundated soil. Until now, few data were available on these forest types in the area (Lindeman & Moolenaar 1959). Teunissen (1978) provided a vegetation map of the Apoera area showing marsh forest dominated by *Mora excelsa* Benth. bordering the Corantijn River region.

*Mesic forest* ('high dryland forest' or 'terra firme forest'), occurring on relatively well-drained soils on hilltops and slopes. Mesic forest is the most abundant vegetation type in the Bakhuis area, with high levels of biodiversity and of commercial timber. *Mora bukea* forests, dominated by *Mora gonggrijpii* (Kleinh.) Sandwith, are mentioned without detailed forest records available for the area. 'Liana' forests, reported as being the remnants of pre-Columbian shifting cultivation fields, are mentioned by Lands Bosbeheer (LBB, Suriname Forest Service).

*Meso-xeric vegetation* (or 'savanna' forest) occurs on impermeable laterite and bauxite outcrops with sparse topsoil, alternately waterlogged during the rainy season and dry during the dry season. This vegetation type, ranging from medium height forest to dwarf brushy thicket, depending on soil depth, is the most mature sylvigenic state in all stony areas with very thin topsoil.

#### FIELD SURVEYS AND SELECTION OF STUDY SITES

Three field surveys were undertaken across a range of seasons: long dry season (24 September–21 October 2005), long rainy season (1–21 April 2006) and short rainy season (29 November–16 December 2006). To obtain a representative sample of the vegetation of the concession area, 50 study sites were selected for detailed assessment. Within the study sites, 10 transects with forest profiles and 11 plot series were studied. Additional floristic collections were carried out whilst traversing tracks and cut lines en route to study areas and in the vicinity of camps.

#### FLORISTIC INVENTORY

In order to understand the botanical diversity of the study area, a list of terrestrial vascular plant species,

including monocotyledons, dicotyledons and ferns, was compiled. Except for a few records, the aquatic vegetation of the area was not specifically studied. Cronquist's classification of flowering plants, still commonly used by the flora of the Guianas botanists, was followed in this article (rather than APG III, 2009; the standard system used in this journal). Some plants were positively identified in the field and were thus not collected as herbarium specimens. Herbarium voucher specimens were collected and preserved, by pressing and drying, in order to deposit full sets at the University of Paramaribo Herbarium (BBS) with duplicates at the Cayenne Herbarium (CAY) and at the University of Utrecht Herbarium (U), now transferred to Leiden (L), when possible. In total, 626 vouchers were prepared, 308 in October 2005, 240 in April 2006 and 78 during December 2006. Vouchers were mainly identified on site and in CAY. Several taxonomic specialists also kindly contributed to the identification of some species. The species' list and herbarium collections were increased by a large photographic collection.

#### VEGETATION TYPOLOGY AND DESCRIPTION

The vegetation types in the study area were described on the basis of the following factors.

*Physical features:* (1) geomorphology; (2) topography; and (3) soil moisture.

*Floristic composition:* (1) dominant and characteristic species (e.g. *Croton argyrophyloides* Müll.Arg., *Mora gonggrijpii* trees, *Euterpe oleracea* Mart. palms, terrestrial bromeliads); and (2) presence of distinctive life-forms (lianas, abundant mosses, palms, epiphytes).

*Population structure:* (1) tree and liana diameter [diameter at breast height (dbh)  $\geq$  5 cm for trees, dbh  $\geq$  2 cm for lianas]; (2) class distribution, height and tree density; (3) average canopy height and heterogeneity; and (4) presence of emergent trees.

#### PLOT SERIES: FOREST STRUCTURE AND BIODIVERSITY INDICES

Forest structure and biodiversity indices (species' diversity/alpha diversity and habitat heterogeneity/beta diversity) were compared for different vegetation types in the study area using plot series sampling. This allowed an in-depth analysis of vegetation to be made over a relatively small surface area. All vascular plants in the plots were sampled, including the understorey layer, trees and woody climbers. The data provided by these plot samples complement the floristic inventory by including sterile plant specimens that were not otherwise collected (although their identification is more difficult than that of fertile specimens). This

sampling protocol also provides additional detailed data at a large scale (over a small surface area) of the vegetation described in the forest profiles, with information on the composition, dimensions and density of the understorey plant populations.

Eleven plot series, generally consisting of five 100-m<sup>2</sup> plots per series (but, in a few cases, three, four or six plots), were delimited in patches of homogeneous vegetation representative of the variety of vegetation types in the study area. Individual plots were circumscribed by a line fixed to flag-taped stakes, enabling a complete inventory to be made of all accessible species rooted inside the perimeter.

The following data were recorded for each plot:

1. Number and abundance of all vascular plants with preliminary identifications.
2. Number and abundance of individual trees (dbh  $\geq$  5 cm) with preliminary identification based on vernacular names provided by local 'tree spotters' (Surinamese residents, not trained in formal botanical sciences, but with extensive and reliable knowledge of trees and plants with their vernacular names).
3. Diameter at breast height of trees (dbh  $\geq$  5 cm) and lianas (dbh  $\geq$  2 cm).
4. Estimated height of trees (dbh  $\geq$  5 cm) and lianas (dbh  $\geq$  2 cm) using a measured reference tree for calibration.
5. Vouchers for taxonomic identification in cases in which the local name was ambiguous, including samples of fallen leaves and fruits, and notes on the characteristics of the bark and trunk, including the presence and shape of buttresses, to aid further identification.

#### Forest structure

Forest structure is presented graphically for each plot series with dbh on the *x*-axis and estimated height on the *y*-axis. The tree density (number of individual trees with dbh  $\geq$  5 cm per ha) is also indicated.

#### Species' diversity and habitat heterogeneity indices

From the species' count per plot and for each plot series at a study site, a graph of the average number of species (*y*-axis) was plotted against the surface area (*x*-axis), enabling the calculation of indices for species' diversity and for habitat heterogeneity, on the basis of a semi-logarithmic normal model species–area curve [ $y = \lambda \ln(x) + \gamma$ ], where *y* is the number of species and *x* is the surface area (Gleason, 1922; Fisher, Corbet & Williams, 1943; Preston, 1948; Palmer, 1990). The slope  $\lambda$  is a determinant of the species' diversity (SDI) and the ratio  $-\gamma/\lambda$  is a determinant of the habitat heterogeneity (HHI), both independent of the sampling area (Bordenave, 1996). Eleven plot series were

assessed for all accessible vascular plants (i.e. terrestrial herbs, shrubs, treelets, trees and climbers).

#### *Family importance value*

The family importance value (FIV; Mori *et al.*, 1987) was calculated for each plot series. This index enables a comparison to be made of species' composition with relative dominance (linked to tree size), relative abundance (linked to the number of individuals) and relative diversity (linked to the number of species) for families of trees (dbh  $\geq$  10 cm) present in the plots.

#### PROFILES – DISTRIBUTION OF VEGETATION TYPES

At a smaller scale (over larger surface areas), the distribution of vegetation types was undertaken by generating forest profiles along transect lines. Sampling was limited to medium and large trees (dbh  $\geq$  10 cm) and climbers (dbh  $\geq$  5 cm). Nine profiles of 500–1000 m in length and 5 m in width were studied over forest transects, providing tree population structure and composition data over areas of 2500–5000 m<sup>2</sup> (0.25–0.5 ha) each. The total surface area covered by these profiles is 2.5 ha (25 250 m<sup>2</sup>).

Vegetation profiles showing the change in vegetation type in conjunction with topography, soil moisture and pedological features were compiled along eight transects (Fig. 2). An additional transect was made in a dwarf meso-xeric thicket found in the southern part of the study area.

At each location, geomorphological features, such as rock outcrops, ridges, slopes, creeks and rivers, and soil moisture were noted. Linear distances and elevation were recorded or estimated by GPS, and were validated with a barometric altimeter. The average height of tree crowns, density of trees and lianas, and aspects of the undergrowth were also noted and sketched for each profile.

#### SPECIES OF CONCERN FOR CONSERVATION

Species of concern were designated on the basis of a number of criteria: (1) listed as 'Rare' or 'Vulnerable' by the International Union for Conservation of Nature (IUCN), the World Conservation Monitoring Center of the United Nations Environment Program (UNEP-WCMC) and/or the Conservation and Sustainable Management of Trees Comity (CSMTC); (2) listed by the Convention on International Trade in Endangered Species (CITES) as species vulnerable to exploitation through trade; (3) listed as 'totally protected' in French Guiana (Ministry Bill, July 5th, 2001) – although most of these species are presumably also rare in Suriname, some may be more abundant outside French Guiana, especially if their distribution is disjunct from their main distributional

range in French Guiana (Hoff *et al.*, 2002); (4) listed on the French Guiana 'Natural Heritage Plant Species List' by the French Guiana Natural Heritage Scientific Board in 1997 (CSRPN, Conseil Scientifique Régional du Patrimoine Naturel); (5) endemics at regional or country scale, or eco-endemics (endemism for a distinctive and restricted biota, e.g. inselberg outcrop or laterite hardcap) at the limit of or disjunct from their main distributional range or with a circum-Amazonian distribution [species with distributional ranges extending throughout northern South America and sometimes Central America, but with a large gap in the Amazonian region, explained by past climatic changes (Prance, 1973; de Granville, 1992, 1994)].

The CSRPN criteria for the determination of species with conservation value (Bordenave, 1997) are as follows.

1. Endemism to a country or phytogeographical region (e.g. the Guiana Shield).
2. Natural rarity of a species (including those present in well-represented habitats).
3. Limit/disjunction to main distributional range: subpopulations found in restricted areas.
4. Fragility as a result of seasonal dependence on different biota.
5. Link to a particularly restricted or threatened habitat.
6. Increasing rarity as a result of habitat reduction or exploitation, particularly for species with slow renewal of generations.
7. Unique characteristics of the species: cultural, pedagogic or historical value.
8. Particular agronomic, forestry, pharmaceutical or other economic value.
9. Phylogenetic uniqueness: single species representing a taxonomic group.
10. Vulnerability to pollution, particularly for riverine, aquatic and estuarine species.

#### QUANTITATIVE BIODIVERSITY INDICES FOR SETTING CONSERVATION PRIORITIES

To be able to determine which vegetation types in the study area should be considered of premium, moderate or lower conservation importance, a number of criteria were used.

#### *Species diversity and habitat heterogeneity indices*

In each plot set, the number of vascular plant species is considered as the sampling area increases.

The species diversity index (SDI), independent of surface area, is calculated from the slope of the log-normal species–area curve. In Bakhuis, it ranges from 18 to 40 in the most species-rich vegetation.

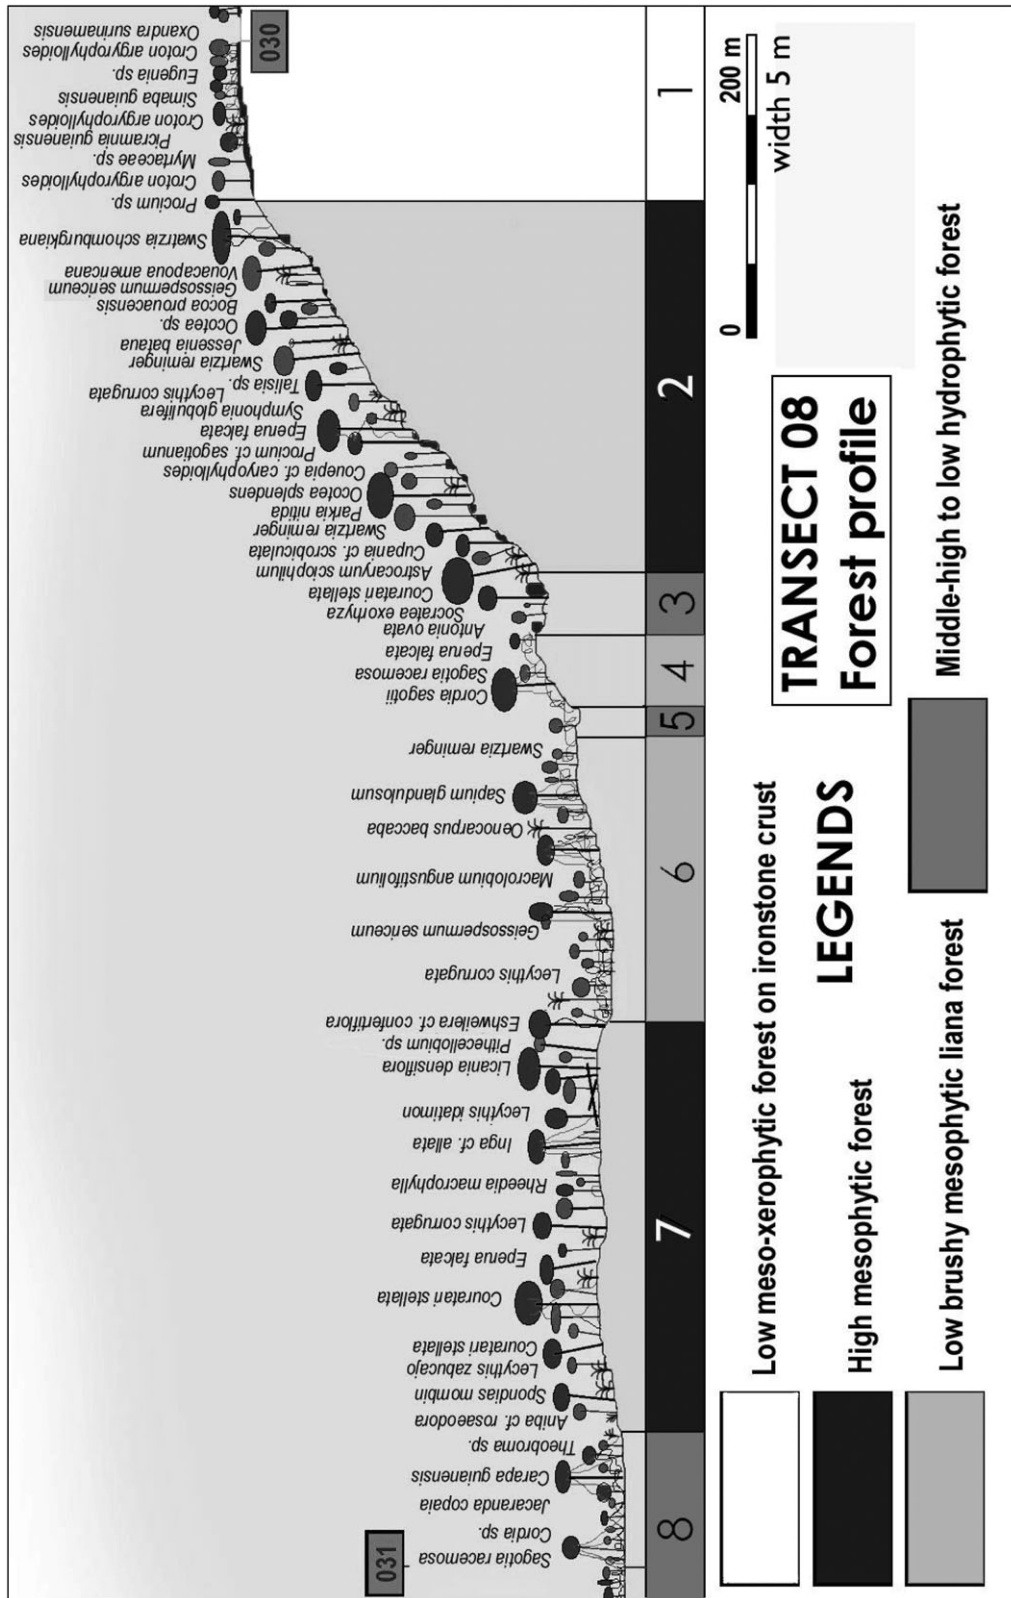

Figure 2. Transect 8 (1000 × 5 m) showing the gradient of vegetation habitats from foot to hilltop.



The habitat heterogeneity index (HHI) is a descriptor of habitat diversity, independent of surface area, also calculated from the species–area curve equation ( $\beta/\alpha$ ) (Bordenave, 1996; Bordenave, de Granville & Hoff, 1998). In the study area, it ranges from 2.5 to 4.0 in the most heterogeneous vegetation.

#### *Ratio of species of concern*

Among the identified vascular plant species, the ratio of those determined to be of concern for conservation (according to the criteria presented above) was calculated for each vegetation type. This ratio (ratio of species of concern, RSC) is one of the indicators used to compare the relative conservation value of these vegetation types.

#### *Relative scarcity index*

The surface area of each primary vegetation type was estimated from the vegetation map. The more restricted is a vegetation type in the study area, the more important it is in terms of local conservation priorities. The relative scarcity index (RSI) is inversely proportional to the relative surface area related to the actual extent of each habitat.

#### *Habitat fragility index*

The ability of vegetation to recover after disturbance is quantified through a habitat fragility index (HFI). Regeneration processes studied along mining lines on the Kaw Mountain in French Guiana between 1997 and 2004 showed that forests recovered differently depending largely on the soil conditions. Taking into account the specificity of the geomorphology and soils of different forest vegetation types, an index ranging from 1 to 5 (Bordenave, Raes & de Granville, 2000) provides a semi-quantitative indicator of habitat fragility and potential recoverability. The index values are defined as follows: (1) very favourable forest regeneration potential; (2) favourable forest regeneration potential; (3) uncertain forest regeneration potential, significant risks of organic soil erosion; (4) low forest regeneration potential, high risks of organic soil erosion; (5) very low forest regeneration potential and obvious risks of soil erosion and desertification.

#### *Ratio of monocotyledons to dicotyledons*

The ratio of monocotyledons to dicotyledons (M/D) is a good indicator of the levels of environmental limitation (de Granville, 1984). In the case of temporarily or permanently inundated vegetation, more monocot species are expected to be present as they are able to tolerate flooding and high groundwater levels better than dicot species. This is also the case in water deficit conditions, with monocots more resistant than dicots. In both cases, the M/D ratio will be higher,

whereas a low M/D ratio is indicative of weak water stress, typical of mesic forest on deep, well-drained ground.

#### *Overall evaluation of the conservation importance of different vegetation types*

The analysis presented below combines the results of the five criteria described above, namely SDI, HHI, RSC, RSI and HFI. These five criteria provide quantitative and semi-quantitative data for this analysis. A determination index (DET) results from the multi-criteria analysis of these indices for each habitat. DET is calculated as follows (Bordenave *et al.*, 2000), with the choice of fixing an even weight to each individual index:

$$\text{DET (hab.)} = \frac{\text{SDI (hab.)}}{\sum \text{SDI}} + \frac{\text{HHI (hab.)}}{\sum \text{HHI}} + \frac{\text{RSC (hab.)}}{\sum \text{RSC}} + \frac{\text{RSI (hab.)}}{\sum \text{RSI}} + \frac{\text{HFI (hab.)}}{\sum \text{HFI}}$$

## RESULTS

### FLORISTICS

#### *Species' inventory*

In all, 584 vascular plant species were identified from voucher specimens (around 94% of the samples collected have been identified to species' level). In addition, 177 common or distinctive species that could be identified with certainty in the field were recorded but not collected. The total number of vascular plant species identified in the study area was therefore 763 (de Granville, Bordenave & Gonzalez 2008). These were distributed among 337 genera belonging to 112 families of vascular plants. The species' list for herbarium vouchers collected during this research is presented in the Appendix.

Of the 584 species in herbarium collections, 542 were spermatophytes (seed-plants), 541 of which were angiosperms (flowering plants) and one was a gymnosperm (a species of *Gnetum* L.). Forty-one were pteridophytes and one was a bryophyte.

#### *Species of concern*

Among the 584 vascular plant species identified from herbarium vouchers, 53 were considered to be of concern for conservation issues: six species were listed as 'totally protected' in French Guiana (Ministry Bill, April 9th, 2001); three were listed in the CITES protected species' lists; five were listed as 'Rare' or 'Vulnerable' by IUCN, UNEP-WCMC and/or CSMTC; 14 other species were listed on the French Guiana 'Natural Heritage Plant Species List' (CSRPN 2000) used as a reference tool for plant conservation



in the Guianas; the others were species' endemics at regional or country scale, or eco-endemics in disjunction of their distributional range.

#### Vegetation typology

A classification of all vegetation observed in the area was proposed, derived from the present study. The vegetation types (five classes, 13 types) of the Bakhuis Mountains are listed below.

- A Inundated forest (IF) (forest on temporarily or permanently inundated soil).
  - A.1 Marsh forest (IFM).
  - A.2 *Euterpe oleracea* swamp forest (IFS).
  - A.3 Riverine forest (IFR).
- B Mesic forest (MF) (forest on well-drained ground).
  - B.1 Mesic forest on plateaus, hilltops and slopes (MF).
  - B.2 Mesic *Mora gonggrijpii* forest ('*Mora bukea*' forests) (MF-M).
  - B.3 Mesic *Buxus citrifolia* Spreng. forest on slopes (MF-B).
- C Low meso-xeric vegetation (LXV) (seasonally dry forests on laterite and bauxite hardcaps).
  - C.1 Low meso-xeric *Croton argyrophylloides* Müll.Arg. forests on laterite hardcaps (LXF).
  - C.2 Dwarf meso-xeric Myrtaceae and Euphorbiaceae thickets on hardcaps (DXT).
- D Liana forest (L) (disturbed forest with impeded regeneration because of dense liana populations).
  - D.1 Liana forest on hydromorphic ground (IF-L).
  - D.2 Mesic liana forests (MF-L).
  - D.3 Low meso-xeric liana forests (LXF-L).
- E Secondary vegetation (SV) (early stages of forest regeneration after natural or anthropogenic disturbance).
  - E.1 Low pioneer vegetation (LPV).
  - E.2 Secondary forest (SF).

#### PLOT SAMPLING: FOREST STRUCTURE AND BIODIVERSITY INDICES

The structure of the vegetation in each plot series was elucidated through forest structure graphs, in which estimated plant height was plotted against trunk diameter measured at breast height (dbh). The density of trees and climbers, the average canopy height and the presence of emergent trees were represented in these graphs. An example is provided in Figure 3, but, because of the number generated in the study, each graph is not reproduced in this article.

SDI, HHI and FIV (Fig. 4) were calculated from these datasets to illustrate species–area relationships (Fig. 5).

#### COMPARATIVE SUMMARY OF BIODIVERSITY INDICES FOR PLOT SAMPLES

Table 1 presents a synthesis of the data treatment of the 11 plot series sampled during this study. The number of families and species recorded in each sample, the average number of species per 100 m<sup>2</sup>, and the M/D ratio, an indicator of the degree of environmental constraints of the habitat (de Granville, 1984), are given. The quantitative biodiversity indices SDI and HHI are provided, together with the log-normal correlation coefficients. These enable a comparative analysis to be made of biodiversity levels among samples and the estimated number of species per hectare for samples to be calculated. The average forest height and dimensions of the highest emerging trees are also noted, as well as the tree density for dbh ≥ 10 cm.

All species' biodiversity indicators (total number of families and species in each plot series, average number of species per 100-m<sup>2</sup> area, SDI and estimated number of species per hectare) demonstrate the following trends (Table 2). HHI mostly follows the same trend. The M/D ratios are also presented in the table.

*Species' diversity* by vegetation type can be ranked as follows: MF > IF >> LXF > MF-B > DXT.

*Habitat diversity* can be ranked in the following order: MF > IF > MF-B >> LXF/DXT.

The *M/D ratio* shows a value for inundated forests twice that for tall mesic forests, demonstrating the obviously stronger soil constraints in floodable vegetation. The values found in *Buxus citrifolia* forest and low meso-xeric forests are comparable with those of mesic forests. The most notable value is that for dry thickets showing the degree of specialization of the plant population to this habitat, which experiences high temperatures and dry conditions during parts of the year: monocot species are overwhelming here.

#### FLORISTIC COMPARISON OF THE DIFFERENT VEGETATION TYPES

The species' and habitat diversity indices are useful for the analysis of the differences between distinct vegetation types, but it is noteworthy that the ratios of rare and endemic species (species of concern) do not necessarily follow the trends described above.

The ratios of species of concern recorded in each of the various vegetation types were compared as a function of the total number of species collected in each vegetation type. Among the forest types described in the study area, the driest, meso-xeric thickets support the highest proportion of species of concern (16.7%). The *Buxus citrifolia* forest, never

**Table 1.** Comparative summary of biodiversity indices for plot series samples

| Plot series | FT         | No. Fam     | No. Sp      | No. Sp/<br>100 m <sup>2</sup> | M/D         | Sample<br>size | SDI          | HHI         | R <sup>2</sup> | Estim<br>Sp/Ha | Canopy<br>height (m) | Emerg.T<br>(m) | Tree<br>density |
|-------------|------------|-------------|-------------|-------------------------------|-------------|----------------|--------------|-------------|----------------|----------------|----------------------|----------------|-----------------|
| Site 6      | MF         | 46          | 96          | 30                            | 0.09        | 500            | 39.89        | 3.94        | 0.976          | 210            | 35–40                | 45             | 900             |
| Site 8      | MF         | 43          | 77          | 25                            | 0.16        | 500            | 32.10        | 3.92        | 0.980          | 170            | 30                   | 40             | 540             |
| Site 15     | MF         | 43          | 76          | 28                            | 0.16        | 500            | 29.95        | 3.72        | 0.989          | 165            | 35–45                | 50             | 460             |
| Site 19     | MF         | 43          | 89          | 36                            | 0.10        | 500            | 32.9         | 3.55        | 0.996          | 186            | 40                   | 45–50          | 780             |
| Mean MF     | MF         | 43.8        | 84.5        | 29.8                          | 0.13        | 500            | 33.71        | 3.78        | 0.985          | 182.8          | 37                   | 46             | 670             |
| Site 10     | IF         | 36          | 58          | 24                            | <b>0.24</b> | 600            | <b>20.47</b> | 3.50        | 0.993          | 117            | 40                   | 50             | 620             |
| Site 12     | IF         | 45          | 95          | 30                            | <b>0.31</b> | 500            | 35.30        | 3.81        | 0.993          | 191            | 30                   | 40–45          | 590             |
| Site 14     | IF         | 40          | 98          | 28                            | <b>0.23</b> | 500            | 35.76        | 3.81        | 0.987          | 193            | 35–40                | 55             | 480             |
| Mean IF     | IF         | 40.3        | 83.7        | 27.3                          | 0.26        | 533            | 30.51        | 3.71        | 0.991          | 167            | 35.8                 | 49             | 563             |
| Site 13     | LXF        | 35          | 63          | 31                            | 0.06        | 400            | <b>22.7</b>  | <b>3.26</b> | 0.996          | 135            | 15                   | 20             | 800             |
| Site 16     | LXF        | 35          | 70          | 41                            | 0.15        | 400            | <b>20.85</b> | <b>2.67</b> | 0.998          | 136            | 15–16                | 18             | 875             |
| Mean LXF    | LXF        | 35          | 66.5        | 36                            | 0.105       | 400            | 21.78        | 2.97        | 0.997          | 135.5          | 15                   | 19             | 838             |
| Site 18     | MF-B       | 25          | 42          | 21                            | 0.17        | 300            | 19.21        | 3.55        | 0.994          | 109            | 30–40                | 45             | 667             |
| Site 32     | DXT        | 25          | 53          | 33                            | <b>0.79</b> | 300            | 18.2         | 2.79        | 0.999          | 117            | 10–12                | 13             | 700             |
| Average     | <b>ALL</b> | <b>37.8</b> | <b>74.3</b> | <b>29.7</b>                   | <b>0.22</b> | <b>455.6</b>   | <b>27.94</b> | <b>3.50</b> | <b>0.991</b>   | <b>157.2</b>   | –                    | <b>39</b>      | <b>690</b>      |

FT, forest type (DXT, dwarf meso-xeric thicket; IF, inundated forest; LXF, low meso-xeric forest; MF-B, *Buxus citrifolia* mesic forest). No. Fam, number of families; No. Sp, number of species; No. Sp/100 m<sup>2</sup>, average number of species in 100 m<sup>2</sup>; M/D, ratio of monocots/dicots; Sample size, plot series surface area in m<sup>2</sup>; SDI, species diversity index; HHI, habitat heterogeneity index; R<sup>2</sup>, log-normal correlation coefficient; Estim Sp/Ha, estimated number of species per hectare; Canopy height (m), average canopy height in metres; Emerg. T (m), emerging tree height in metres; Tree density, number of trees (diameter at breast height = 10 cm/ha. Bold type in indicates the most distinctive values.

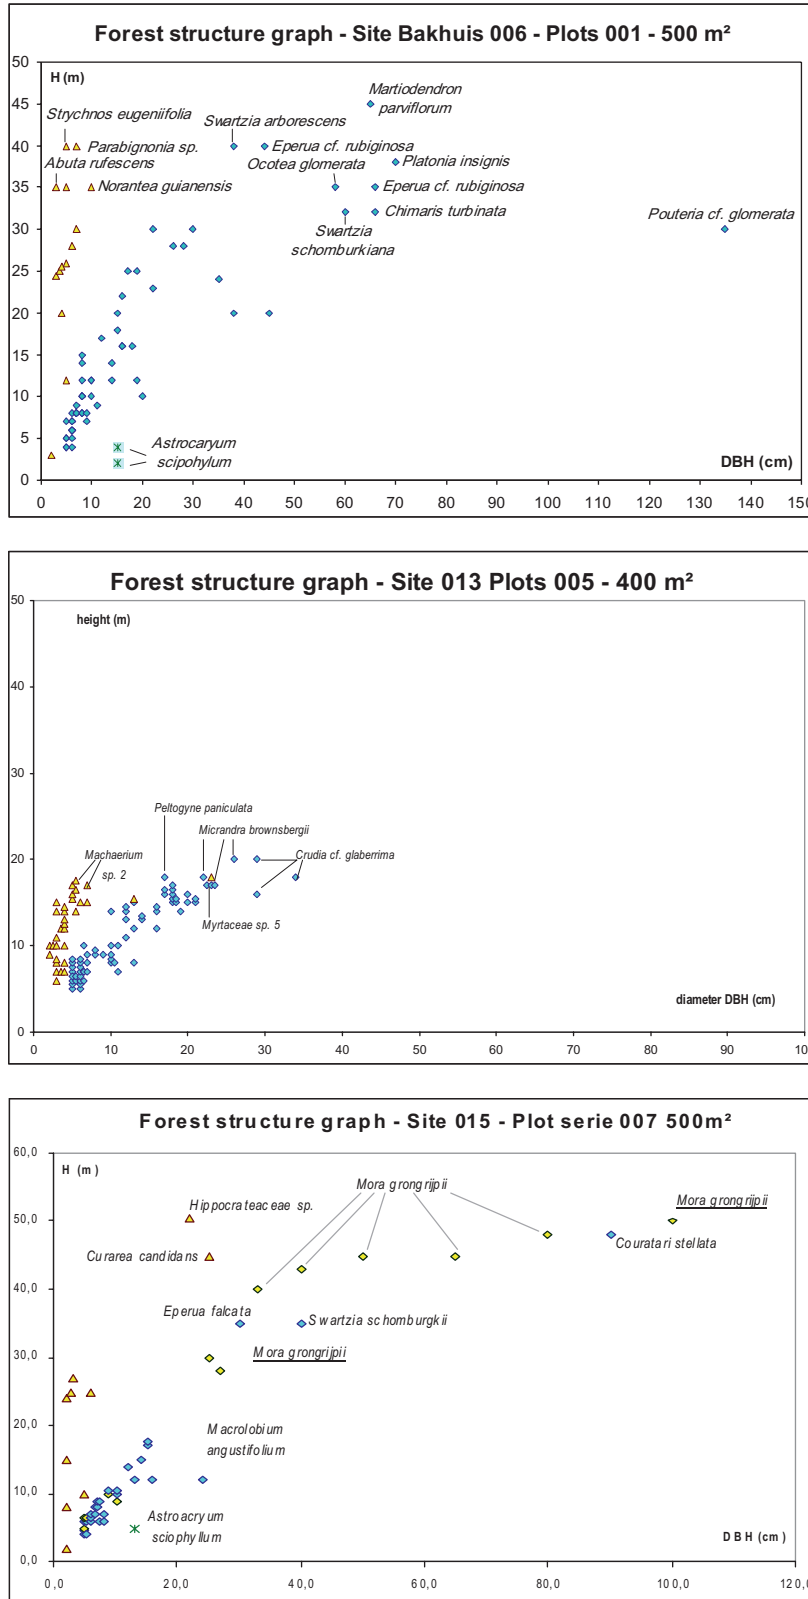

Downloaded from https://academic.oup.com/botimnean/article/167/1/94/2418610 by guest on 25 April 2024

**Figure 3.** Example of rainforest structure graphs in plot series in the Bakhuis area: plot 1, tall mesic forest on hill top; plot 3, tall ‘pina palm’ inundated forest; plot 5, low meso-xeric forest on laterite/bauxite hardcap; plot 6, tall inundated forest on flat alluvial ground; plot 7, tall mesic ‘*Mora bukea*’ forest; plot 9, *Buxus citrifolia* forest on bedrock.



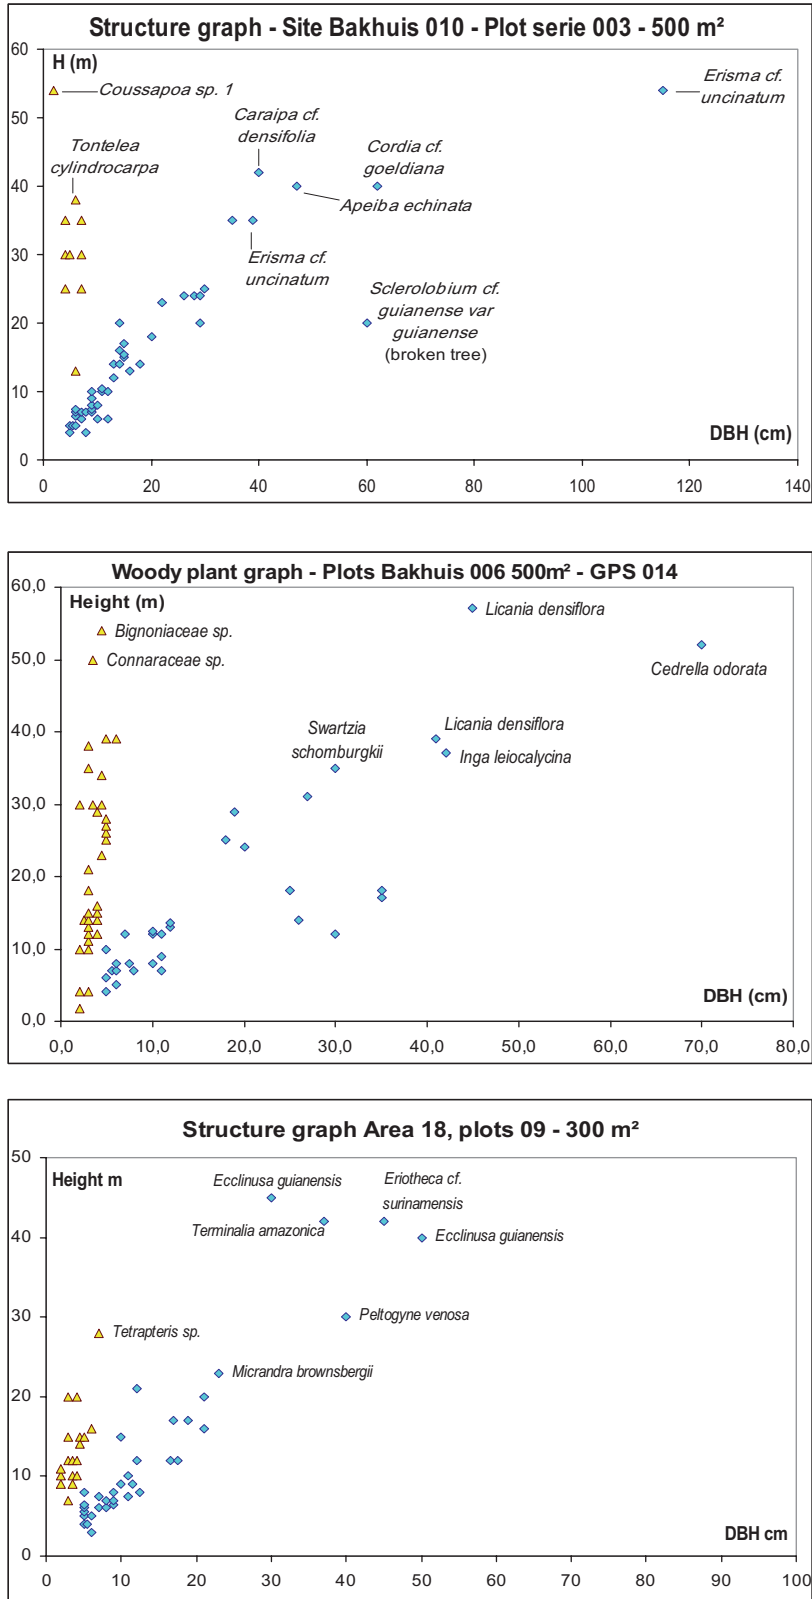

Downloaded from https://academic.oup.com/botlinnean/article/167/1/94/2418610 by guest on 25 April 2024

Figure 3. Continued

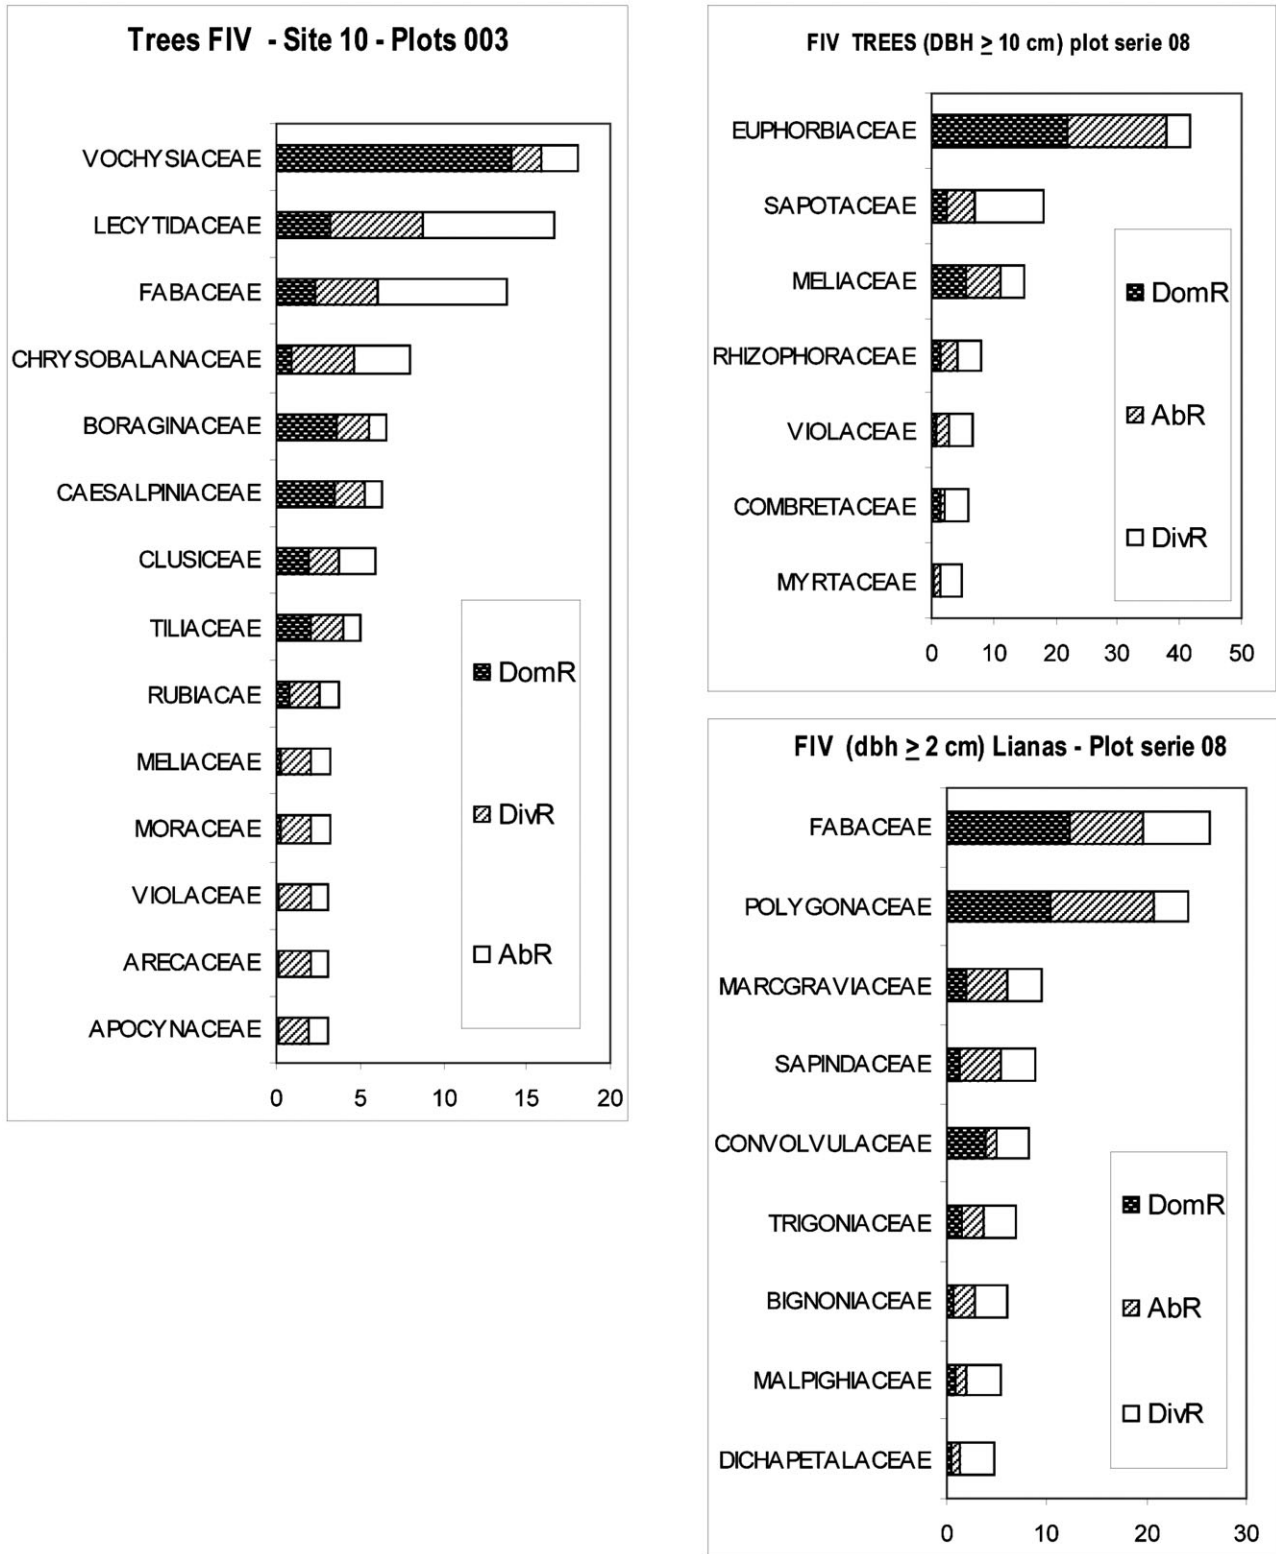

Downloaded from https://academic.oup.com/botj/advance-article/doi/10.1093/bj/167/1/94/2418610 by guest on 25 April 2024

**Figure 4.** Examples of family importance value (FIV) graphs for trees with a diameter at breast height (dbh) > 10 cm in plot set 3 – tall ‘pina palm’ (*Euterpe oleracea*) inundated forest – and for both trees with dbh > 10 cm and woody climbers with dbh > 2 cm in plot set 8 – low meso-xeric forest on laterite hardcap. DomR is the relative dominance, DivR is the relative diversity and AbR is the relative abundance.

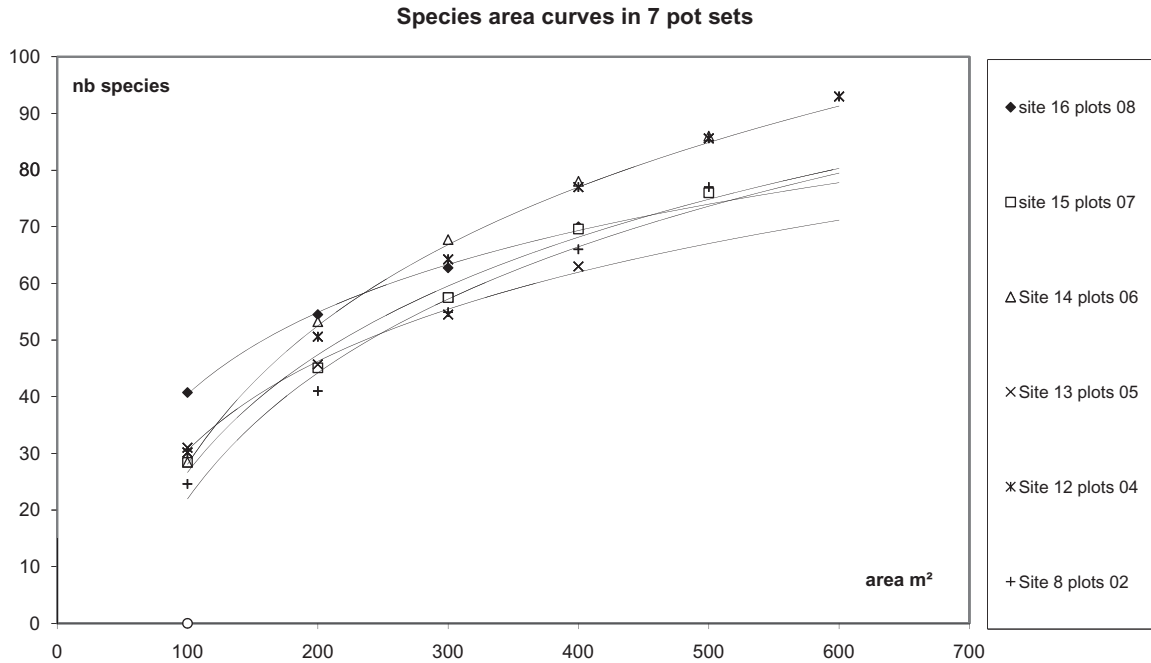

**Figure 5.** Examples of species–area curves in seven plot sets: plot 2, mature mesic forest on hill slope; plot 4, inundated forest on alluvial ground; plot 5, low meso-xeric forest on laterite/bauxite hardcap; plot 6, tall inundated forest on flat alluvial ground; plot 7, tall mesic *Mora bukea* forest; plot 8, *Buxus citrifolia* forest on bedrock.

**Table 2.** Average species’ diversity (SDI) and habitat heterogeneity (HHI) indices and monocot/dicot ratio (M/D)

| Vegetation type                | SDI          | HHI         | M/D         |
|--------------------------------|--------------|-------------|-------------|
| Tall mesic forests             | <b>33.71</b> | <b>3.78</b> | 0.13        |
| Tall inundated forest          | <b>30.51</b> | <b>3.71</b> | <b>0.26</b> |
| Low meso-xeric forests         | 21.78        | 2.97        | 0.11        |
| <i>Buxus citrifolia</i> forest | 19.21        | <b>3.55</b> | 0.17        |
| Dwarf meso-xeric thicket       | 18.2         | 2.79        | <b>0.79</b> |

Bold type indicates the most distinctive (highest) values.

previously described in the Guianas region, vulnerable because of its restricted occurrence and high RSC (14.3%), is regarded as being of high conservation value.

Tall mesic forest on ridges and slopes ranks third in terms of the proportion of species of concern, with a ratio of 8.9% of the total number of plants recorded. The low meso-xeric ‘*Croton*’ forests show a lower percentage of 6.3%. Lastly, swamp and marsh forests appear to harbour the lowest RSC, with only 4.7%. No sensitive species were identified in liana forests, a forest habitat that appears to be a deviation from the normal sylvigenic cycle following some disturbance: it occurs on a variety of pedo-geological conditions (rock outcrops, hydromorphic and well-drained ground) and in most of the main vegetation types.

Some trends emerged from the comparison of the species of concern in each vegetation type:

1. Particularly in mesic forests, but also in inundated forests, the species of concern are mostly endemic and near-endemic species of the Guianas (eight for dryland and three for wetland forests), including two species restricted to the mountains of Suriname: *Oxandra surinamensis* Jans.-Jac. and *Malmea surinamensis* Chatrou.
2. Conversely, in drier low forests and dwarf thickets, as well as in *Buxus citrifolia* mesic forests on granite bedrock, the majority of species of concern recorded are species at the edge of their distributional range, some of which are listed as rare, sensitive or vulnerable species by various national and international bodies (CITES, UNEP-WCMC, IUCN, CSRPN). The species situated in the limit of their distributional range are almost exclusively species found in drier and more mountainous regions of Venezuela, Colombia, Ecuador and Peru (*Amphilophium* cf. *aschersonii* Ule, *Monotagma secundum* K.Schum., *Heisteria* cf. *insculpta* Sleumer), sometimes reaching Central America (*Buxus citrifolia*, *Dimerocostus strobilaceus* Kuntze, *Solanum* aff. *Adhaerens* Willd. ex Roem. & Schult.). One species, rare in the Guiana Shield, shows a circum-Amazonian distribution [*Selaginella* cf. *erythropus* (Mart. Spring)]. Two species are, however, endemic to Suriname and



**Table 3.** Determination index (DET) for habitat conservation prioritization

| Habitats                              | SDIr        | HHIr        | RSCr        | RSIr        | HFIr        | DET          |
|---------------------------------------|-------------|-------------|-------------|-------------|-------------|--------------|
| Dwarf meso-xeric thicket (DXT)        | 2.32        | 2.86        | <b>5.59</b> | <b>6.61</b> | <b>4.44</b> | <b>21.82</b> |
| <i>Buxus citrifolia</i> forest (MF-B) | 2.44        | <b>3.42</b> | <b>4.78</b> | <b>6.61</b> | <b>3.33</b> | <b>20.58</b> |
| Tall mesic forest crest (MFC)         | <b>4.29</b> | <b>3.64</b> | 2.98        | 1.65        | 3.16        | 17.72        |
| Tall mesic forest slope (MFs)         | <b>4.29</b> | <b>3.64</b> | 2.98        | 1.10        | <b>3.16</b> | 15.17        |
| Low meso-xeric forest (LXF)           | 2.78        | 2.86        | <b>2.11</b> | 2.36        | <b>4.21</b> | 14.32        |
| Tall inundated forest (IF)            | <b>3.88</b> | <b>3.57</b> | 1.57        | 1.65        | 2.11        | 12.78        |
| Total                                 | 20.00       | 20.00       | 20.00       | 20.00       | 20.00       | 100%         |

HFIr, relative habitat fragility index; HHIr, relative habitat heterogeneity index; RSCr, relative rare species of concern index; RSIr, relative scarcity index; SDIr, relative species diversity index. Bold type indicates the most distinctive values.

restricted to these drier habitats: *Oxandra surinamensis* Jans.-Jac. and *Byrsonima surinamensis* W.R.Anderson. One species, *Calycorectes batavorum* McVaugh, is thought to be a strict endemic to the Bakhuis Mountains.

#### Vegetation distribution

In terms of the overall distribution, tall mesic forest is overwhelmingly dominant in the study area, covering some 50% of the total surface area. For the purpose of later analysis, mesic forests on slopes (MFs) and on crests (MFC) are differentiated. Inundated forest types also cover a significant proportion of the study area (20%), and are distributed evenly throughout the concession. The *Buxus citrifolia* mesic forest covers only 5% of the surface area (estimated from ground studies), and is restricted to a few sites in the northern half of the concession; the dwarf meso-xeric thicket also covers around 5% of the surface area, and is located mainly in the southern half of the area.

#### QUANTITATIVE BIODIVERSITY INDICES FOR SETTING CONSERVATION PRIORITIES

##### Species' diversity and habitat heterogeneity indices

Quantitative indicators of both species' diversity ( $\alpha$  diversity) and habitat heterogeneity ( $\beta$  diversity) for the various vegetation types are summarized and compared, providing crude SDI and relative (SDIr) values as a percentage of the overall cumulative values, as well as crude HHI and relative (HHIr) values.

##### Ratio of species of concern

The ratio of species of concern to the total number of species is recorded in each of the main forest habitats, as presented above.

##### Relative scarcity index

The scarcity index is also recorded in association with the relative surface area of each primary vegetation

type. When considering RSI, *Buxus citrifolia* mesic forest and dwarf thickets are the most restricted habitats in terms of surface area. The values for low meso-xeric 'Croton' forest are moderately high in the Bakhuis area, although it seems to occur infrequently outside this mountain range.

##### Habitat vulnerability index

The highest values (4) are given for low and dry vegetation with the shallowest soils, intermediate values (3) for mesic forests on slopes, and lowest values (2) for forest on crests and inundated forests on flat ground with generally deep alluvial soils.

##### Overall evaluation of the conservation importance of different vegetation types

DET for the prioritization of habitats for conservation purposes, as calculated above, is presented in Table 3 and represented graphically in Figure 6, indicating the contribution of each criterion given as relative values ( $r$ ). It enables a comparison to be made of a conservation value for each forest type. It should be noted that these values consider the forest types in relation to the other forest types in the study area, not to forest types outside the study area.

The relative ratio of species of concern (RSCr) and the relative surface index (RSIr) appear to be the main drivers of DET. This comparative analysis of the main primary vegetation types described in this study highlights two restricted forest habitats as being of highest concern for habitat and species' conservation:

1. Dwarf meso-xeric thicket is the most floristically distinct, vulnerable to disturbance and restricted vegetation type, very rich in rare and sensitive species, although its SDI and HHI are low.
2. *Buxus citrifolia* forest is equally restricted in surface area, less vulnerable to disturbance but harbours a large proportion of species of concern. Its species' diversity is slightly higher and this

Determination criteria for habitats conservation priority

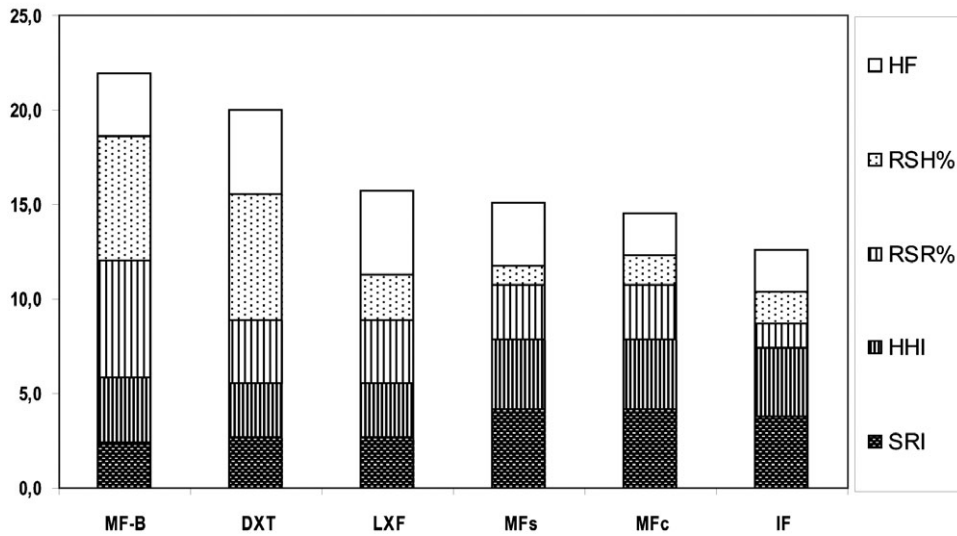

**Figure 6.** Multi-criteria analysis for a conservation priority determination index in the forest types in the study area. MF-B, *Buxus citrifolia* mesic forest; DXT, dwarf meso-xeric thicket; LXF, low meso-xeric forest; MFs, mesic forest on slopes; MFc, mesic forest on crests; IF, inundated forest.

vegetation type is slightly more heterogeneous when compared with dwarf meso-xeric thicket.

Tall mesic forest (MF) on both crests (MFc) and slopes (MFs) has intermediate DET. MF shows high species' diversity and habitat heterogeneity and a significant proportion of species of concern, many of which are endemic to the region or the area. However, this forest type is widespread in the region, particularly MFs.

Low meso-xeric forest also displays intermediate values for conservation issues. However, the scarcity of laterite plateaus (on which it stands together with DXT) as a habitat at a regional scale (not taken into account in the estimation of the relative surface area of vegetation types, which is restricted to the study area) should be considered for the conservation of this vegetation. Inundated forests have the lowest value. They are less species rich and more likely to recover from disturbance because of more favourable environmental factors. Furthermore, these forests host the lowest proportion of species of concern and cover a significant proportion of the study area (estimated at 20%). However, this vegetation is closely linked with the hydrological regime and its disturbance may have serious consequences for the biological and physical characteristics of the aquatic environment. It was noted in a few places that, where stream and river crossings were constructed in the concession without adequate drainage, the upstream-inundated forest was drowned, sometimes over significant areas. These forests are particularly sensitive to fairly small

changes in water levels. Therefore, although showing the lowest conservation priority values, wetlands should be considered to be important for hydrological and ecological regulation.

DISTINCTIVE VEGETATION DESCRIPTION

Among the 13 vegetation groups found in the study area, the following two are the most distinctive, according to both physiognomy and biodiversity determination index.

*Buxus citrifolia* mesic forest (MF-B)

This highly restricted forest type has not yet been described in the Guianas region. It was only observed on three sites midway up hill slopes in the northern part of the study area. The pedological conditions were characterized by the presence of outcropping crystalline bedrock boulders. The generally low canopy (c. 15–25 m) is discontinuous, allowing significant light to reach the forest floor. The forest is characterized by the dominance of *Buxus citrifolia* (Buxaceae), a rare species in Suriname (UNEP-WCMC 'Rare', at the easternmost limit of its distributional range), which is usually associated with *Esenbeckia pilocarpoides* Kunth (Rutaceae) and *Vitex compressa* Turcz. (Lamiaceae). The latter two species, present at each site, are small- to medium-sized trees. The understorey harbours many small trees, but the density of shrubs and herbs is low and the floristic composition is highly variable: in places, *Rinorea* cf.

*riana* Kuntze (Violaceae) is generally dominant, whereas, elsewhere, a dense population of *Conchocarpus heterophyllus* (A.St.-Hil.) Kallunki & Pirani (Rutaceae) is present. In addition to *Buxus citrifolia*, two other very rare species are found in MF-B, namely *Malmea surinamensis* Chatrou (Annonaceae), endemic to the mountains of Suriname, and *Selaginella* aff. *erythropus*, which is a potentially new species or related/co-specific to *S. erythropus*, and therefore a new record for the Guiana Shield.

#### *Dwarf meso-xeric Myrtaceae and Euphorbiaceae thickets on hardcaps (DXT)*

This vegetation type occurs in very restricted patches in the southern part of the study area. It is characterized by shrubby growth along its margins and a very low tree layer (on average 5 m high). It represents the most reduced form of forest on laterite and bauxite hardcaps as a result of the following limiting environmental conditions: (1) an almost complete absence of organic soil over the outcropping hardcap; and (2) significant temporary drought during the dry season because of the minimal water retention capacity of the substrate. Physiognomically, it most closely resembles the thicket vegetation observed on granite inselbergs (rock savannas) in other parts of Suriname and the Guianas, despite growing on a quite different substrate. Only four patches of this vegetation type were encountered during the field surveys, although several other patches were seen during the aerial survey over the study area, and a number of other such patches were located during analysis of the satellite imagery. Although this thicket vegetation contains several species in common with low meso-xeric forest (LXF), significant differences in the species of treelets and shrubs present within the two plant families were noted. Many Myrtaceae (*Myrcia guianensis* DC., *M. aff. pyrifolia*, *M. saxatilis* (Amshoff) McVaugh, *M. sylvatica* DC.) and Rubiaceae (*Chiococca nitida* Benth., *Guettarda spruceana* Müll.Arg., *Ixora graciliflora* Benth., *Psychotria bracteocardia* Müll.Arg., *P. hoffmannseggiana* Müll.Arg. and the rare *Rudgea crassiloba* B.L.Rob.) were found only in the thicket. A rare, small-leaved treelet in Ochnaceae, *Quiina* aff. *wurdackii* Pires (potentially new to science), was relatively frequent and characteristic of this particular habitat. Another characteristic species is the small Malpighiaceae tree *Byrsonima surinamensis*, ‘Secrepatu kers’, endemic to Suriname, and probably an eco-endemic of laterite hardcaps. Woody climbers of moderate dimensions are also well represented: *Mandevilla scabra* K.Schum., *Matelea cremersii* Morillo, a species of Connaraceae, *Norantea guianensis* Aubl., *Coccoloba* sp. (potentially new to science) and, above all, Bignoniaceae species (*Anemopaegma* cf. *chrysoleucum*, *Lundia erionema*, *Memora* sp.). The species found in this

vegetation type tend to be more restricted in occurrence compared with those found in the surrounding mesic and inundated forests. In addition to the species of concern listed above, the following species are considered rare and restricted to this vegetation type: *Calliandra hymenioides* (Fabaceae Mimosoideae), *Neea* cf. *constricta* Spruce ex J.A.Schmidt (Nyctaginaceae), *Ouratea leblondii* (Tiegh.) Lemée (Ochnaceae) and *Phoradendron strongyloclados* Eichler (Santalaceae). Dense populations of terrestrial bromeliads, well adapted to these dry conditions, may proliferate, sometimes forming almost monospecific undergrowth populations, e.g. *Guzmania* aff. *lingulata* Mez and *Vriesea splendens* (Brongn.) Lem. *Aechmea bromeliifolia* Baker ex Benth. & Hook.f., *A. melinonii* Hook. and *Tillandsia flexuosa* Mez also occurred in scarce populations. The presence of populations of two infrequent species of wild pineapple, *Ananas ananassoides* (Baker) L.B.Sm. and *A. nanus* (L.B.Sm.) L.B.Sm., must be highlighted, following World Bank Guidelines as wild gene banks for important agricultural plants: both of these relatively rare species are endemic to the Guiana Shield.

Within this vegetation, at moderately high elevation (mostly > 300 m), the nocturnal dew and persistent mists favour the growth of herbaceous epiphytes, especially orchids and Araceae. In one single site, > 60 species of orchid, including two wild species of *Vanilla* Mill., were distinguished. Although some of the orchids found at Bakhuis are common with Brownsberg, Lely and Nassau Mountain species, several distinctive species, including some extremely rare taxa, were present.

The other vegetation types, although showing some differences in species’ composition when compared at a regional scale, are more common and widespread throughout the Guianas. These were described in some detail in the original baseline study, but these descriptions are not presented in this article.

## DISCUSSION

The conservation of rainforest biodiversity in the Guianas is a major challenge for the coming decades, as development progresses and population pressures increase (Gentry & Dodson 1987; Bordenave & de Granville 1998). How do we reconcile wildlife and biodiversity conservation with fair and equitable sustainable development in these tropical countries? The sound management of the natural heritage of the Guianas requires a combined effort from scientists, local and indigenous people, nature conservation institutions, nongovernmental organizations, corporations and institutional decision-makers.

The method presented in this article to set local-scale conservation priorities takes into account a



variety of biodiversity criteria (species' and habitat diversity, proportion of rare species, relative surface area and regeneration capacity of habitats) at the scale of a large, but localized, study area. It identifies areas within the study area in which regional-scale conservation efforts should be focused. However, this method has its limitations. In this work, the study perimeter was large (2800 km<sup>2</sup>) and a significant proportion of the area was inaccessible. Therefore, the sampling undertaken for the study only provided a relatively small sample of the actual flora and vegetation of the area. A total area of 5000 m<sup>2</sup> (0.5 ha), delimited in 11 plot sets in the various identified vegetation types, was comprehensively inventoried for all vascular plant species, which provides detailed information on the flora and vegetation in each habitat, over a small area. The diversity of understorey species is considered to be well represented over this area and captured by the plot samples. The larger, woody species (trees and large climbers) require a larger sampling area to gather in-depth floristic diversity data. To this end, transects and profiles were sampled, covering a much larger area of 2.5 ha. The difficulty in harvesting fertile vouchers (fertile specimens of trees and lianas are often at heights of 30–50 m above ground level) remains a major limitation to species' identification in the field. The same limitation arises with tall-standing epiphyte species, which are hardly taken into account in forest species' diversity. Vernacular names provided by skilled 'tree spotters' improve the evaluation of actual tree species' diversity, but new species and subspecies are difficult to distinguish from similar known taxa in this manner. The collection of vouchers from low branches, juvenile trees and fallen flowers or fruit helps to identify taxa. However, there are unavoidable instances when fertile vouchers are lacking.

Despite the limitations caused by the lack of regional-scale information, the conservation priority setting protocol and the resultant analysis, derived from a large set of field data (with precise species' composition and structure of the various vegetation types present in a given area), provides an effective tool for the ranking of conservation priorities and for the consequent management of development programmes.

The distribution of vegetation types in the study area is an intricate patchwork, determined largely by factors such as the type and degree of fracturing of the substrate, slope and soil drainage and seasonal changes in wetness of the habitat. Other factors, such as palaeoclimatic changes, dispersal limitations and density dependence (Volkov *et al.*, 2005), and natural disturbances caused by storms and floods, may have played a role in structuring the present-day forest: a mosaic of vegetation types dominated by mesic and inundated forests, with distinctive remnants of xeric

flora, represented by low, dry thickets and by low *Buxus citrifolia* forest patches. Among the 13 vegetation types observed during this study, two habitats emerged as restricted in distribution, vulnerable to disturbance, with distinctive vegetation harbouring a significant proportion of rare and endemic species: dwarf meso-xeric thicket and *Buxus citrifolia* forest. According to the results of the multi-criteria analysis, these habitats are considered to be of a higher level of conservation concern at a regional scale than the other vegetation types present in the study area. In addition, low 'Croton' forest is also of conservation concern, as the potential for this forest to regenerate on its very thin topsoil is limited. The other vegetation types, more widespread at both the local and regional scale, nevertheless also require protection as far as possible: these forest types harbour a large set of plant species of different life forms, including rare and endemic species, and a rich fauna that is currently almost totally unexposed to human activity.

An understanding of the changes that have occurred to the vegetation of the Guianan region through geological time can provide useful insights into the current distribution patterns and diversity of vegetation. Palaeoclimatic studies have elucidated the climate variations that occurred during the Quaternary era (Ab'Saber, De Boer, Van Geel & Tricart, cited by de Granville, 1994). The cold, drier climate that occurred during the Tertiary era glacial ages alternated with warmer, wetter interstadial periods. During the last long glacial episode (the Würm period between 22 000 and 13 000 BP), the ensuing drought probably caused a significant retreat of the rainforest in tropical South America, which remained only along rivers as gallery forests and in deep, sheltered valleys in hilly and mountainous areas. The remaining vegetation appeared to harbour an association of more drought-resistant species with semi-deciduous forests and more extensive savannas. At the end of these extended drying periods, the rainforest species once again spread from the remnant patches in which they had persisted, whereas the more xerophytic species retreated to drier, more exposed areas, namely the white sands, rocky outcrops and laterite hardcaps. This improves the prediction of the conservation priorities for the future, in the light of the adaptation potential of ecosystems and plant populations. Considering the potential for climate change and the consequent implications for conservation, it is also important to place the current distribution and pattern of vegetation types in a palaeo-historical context.

For mid- to long-term conservation planning, it is important to consider that the maintenance of habitat diversity is essential to ensure adaptation potential for climate change: if the climate becomes drier, xeric

species found in meso-xeric dwarf thicket and low forest vegetation require adequate representation in gene and seed banks to facilitate a range extension; conversely, if the climate becomes wetter, remnant patches of more xeric vegetation will tend to disappear locally, increasing their conservation importance. The two xeric vegetation types present in the study area are ranked as the highest priority for conservation within this area. However, the vegetation types that dominate the study area, low and dry 'Croton' forest, tall mesic and inundated forests, also merit conservation and protection in terms of the maintenance of the high biodiversity that they support.

### CONCLUSIONS

Reconciling development and land use planning pressures with biodiversity conservation needs remains one of the key challenges in one of the three major remaining evergreen rainforest eco-regions in the world. This often directly conflicting issue was highlighted by this study, where a vegetation type, such as the dwarf meso-xeric thicket, with a high conservation priority, is restricted to the substrate that contains a valuable mineral. A common limitation of detailed biological studies in remote and largely unstudied areas, such as the Bakhuis Mountains, is that the study area immediately becomes a 'hot spot' for biodiversity conservation, as the distribution and occurrence of species and habitats outside of the study area are poorly acknowledged. To ensure that the conservation value of species and vegetation types is properly understood and correctly prioritized in order to inform decisions regarding sustainable development of natural resources, it is essential that conservation prioritization at a local scale is integrated and contextualized at a regional scale. Given the small geographical area of each of the constituent countries of the Guiana Shield, this regional context generally extends beyond national boundaries. It is therefore essential that cooperation and knowledge sharing within the region should continue to be fostered, particularly in the fields of botany, forest ecology and conservation science.

### ACKNOWLEDGEMENTS

The original flora and vegetation study of the Bakhuis Mountains was carried out as part of the environmental assessment of a proposed bauxite mining project led by BHP Billiton/Suralco. Our study was coordinated by SRK Consulting, who managed the Environment and Social Impact Assessment for the project. The authors wish to thank the following: Frits Van Troon, who provided invaluable input to tree identifications, with incomparable skill and great kindness; Pieter Teunissen, for his introduction to the Bakhuis vegetation and

help with the listing of specimens, for voucher export purposes and contact with Suriname research and conservation administrations; Johnny James, who also contributed significantly to the tree identification and for his kind help in the botanical samplings; Imro Van Troon, for his efficient assistance in the botanical collections; all the BBS Suriname Herbarium team and, specifically, Joeliaka Beharie-Ramdas, Iwan E. Molgo and Gisla S. Doerga for their participation and help in the field; and the Cayenne Herbarium staff, especially Françoise Crozier and Michel Boudrie, who very diligently processed the herbarium vouchers with the help of the Flora of the Guianas Network of Taxonomic Specialists. Great thanks are due to Andy Witcomb, BHP Billiton Environment Supervisor, and to all the BHP Billiton team for their welcome at the Bakhuis base camp and constant help during our field work, especially to Steve Chin A. Foeng, Raouël, Delano, Dwight and Tony for their contribution and kind help in Bakhuis, for effective support and on-site coordination of the environmental studies, as well as for safely driving our team exactly where we needed, sometimes through difficult terrain, and for organizing the fly camps. Thanks are due to STINASU and SBB authorities for research and sample export permits. Special thanks are due to Suzanne Reuther and Christopher Dalglish of SRK Consulting for efficient coordination of the field and desk work, and to Mike Steyn of Aspire Solutions and Adriaan Van Niekerk of Stellenbosch University for their decisive contributions to the satellite imagery processing and vegetation mapping.

### REFERENCES

- APG III. 2009.** An update of the Angiosperm Phylogeny Group classification for the orders and families of flowering plants: the Angiosperm Phylogeny Group. *Botanical Journal of the Linnean Society* **161**: 105–121.
- Bordenave BG. 1996.** Mesures de la diversité spécifique des plantes vasculaires en forêt sempervirente de Guyane. Thesis, University Pierre and Marie Curie, Paris 6.
- Bordenave BG. 1997.** *Réflexion sur les méthodes de détermination des espèces et des habitats patrimoniaux de Guyane – réunion du CSRPN de Guyane, 22, 23 et 24 octobre 1997.* Cayenne: Conseil Scientifique Régional du Patrimoine Naturel (CSRPN). Ecobios Ed.
- Bordenave BG, de Granville JJ. 1998.** Les mesures de biodiversité: outil de conservation en forêt guyanaise. *JATBA, Revue d'Ethnologie* **40**: 433–446.
- Bordenave BG, de Granville JJ, HOFF M. 1998.** Measurement of species richness of vascular plants in a neotropical rainforest, French Guiana. In: Dallemeier F, Comiskey J, eds. *Forest biodiversity in North, Central and South America: research and monitoring. MAB Series Vol. 21.* Paris: UNESCO, 411–425.

- Bordenave BG, Raes N, de Granville JJ. 2000.** Etat initial de la végétation forestière de la Montagne de Kaw 2. Rapport de Mission ASARCO. Cayenne: IRD Report.
- FAO. 1996.** *Suriname: country report to the FAO International Technical Conference on Plant Genetic Resources (Leipzig, 1996)*. Paramaribo: Ministry of Agriculture, Animal Husbandry and Fisheries. May 31 1995.
- Fisher RA, Corbet AS, Williams CB. 1943.** The relation between the number of species and the number of individuals in a random sample of an animal population. *Journal of Animal Ecology* **12**: 42–58.
- Gentry AH, Dodson C. 1987.** Tropical forests biodiversity: distributional patterns and their conservational significance. *Oikos* **63**: 19–23.
- Gleason HA. 1922.** On the relation between species and area. *Ecology* **3**: 158–162.
- Görts-van Rijn ARA, Jansen-Jacobs MJ, Royal Botanic Gardens, Kew. 1985–2009.** *Flora of the Guianas, Series A: Phanerogams. Fascicle 1–53*. Richmond: Royal Botanic Gardens, Kew.
- de Granville JJ. 1984.** Monocotyledons and pteridophytes: indicators of environmental constraints in tropical vegetation. *Candollea* **39**: 265–269.
- de Granville JJ. 1991.** Remarks on the montane flora and vegetation of the Guianas. *Willdenowia* **21**: 201–213.
- de Granville JJ. 1992.** Un cas particulier de distribution: les espèces forestières péri-amazoniennes. Workshop Phytogéographie des Guyanes. Sept. 1990, UNESCO, Paris. *Compte-Rendus de la Société Biogéographique* **68**: 1–33.
- de Granville JJ. 1994.** Rainforest and xeric flora refuge in French Guiana. In: Prance GT, ed. *Biological diversification in the tropics*. New York: Columbia University Press, 159–181.
- de Granville JJ, Bordenave BG, Gonzalez S. 2008.** Bakhuis Mountains (Suriname) flora and vegetation study in the frame of the Environment, Social and Impact Assessment Study for a BMS bauxite mining project (BHP Billiton & Suralco). ATBC Symposium, 9–13 juin 2008 – Paramaribo (Suriname). In: Lucas E, ed. *Flora of the Guianas Newsletter n°16, special workshop issue*. Kew: Royal Botanic Gardens, 38.
- Hoff M, de Granville JJ, Lochon S, Bordenave B, Hequet V. 2002.** Elaboration d'une liste de plantes à protéger pour la Guyane française. *Acta Botanica Gallica* **149**: 339–354.
- Lindeman JC, Moolenaar SP. 1959.** Preliminary survey of the vegetation types of northern Suriname. *The vegetation of Suriname* **1**: 1.45.
- Lindeman JC, Mori SA. 1989.** The Guianas. In: Campbell DG, Hammond HD, eds. *Floristic inventory of tropical countries*. New York: New York Botanical Garden, 375–390.
- Maas PJM. 1971.** Floristic observations on forest types in western Suriname I. *Proceedings of the Koninkl Nederl Akademie van Wetenschappen – Amsterdam, Series C* **74**: 269–302.
- Mittermeier RA, Malone SA, Plotkin MJ, Baal FLJ, Mohadin K, MacKnight J, Werkhoven MCM, Werner T. 1990.** Conservation Action Plan for Suriname. Conservation International, National Report of Suriname. FAO Office for Latin America and the Caribbean. 65.
- Mori SA, Black D, Boeke JD, Boom BM, Cremers G, Mitchell JD, Prance GT, de Zeeuw C. 1987.** The Lecythidaceae of a lowland neotropical rainforest: La Fumée Mountain, French Guiana. *Memoires of the New York Botanical Garden* **44**: 1–190.
- Palmer AR. 1990.** Predator size, prey size, and the scaling of vulnerability: hatchling gastropods vs. barnacles. *Ecology* **71**: 759–775.
- Prance GT. 1973.** Phytogeographical support for the theory of Pleistocene forest refuge in the Amazon Basin. *Acta Amazonica* **3**: 5–26.
- Preston FW. 1948.** The commonness and rarity of species. *Ecology* **29**: 254–283.
- Pulle A, Lanjouw J, Stoffers AL, Lindeman JC. 1932–1984.** *Flora of Suriname Vol. 1–4*. Amsterdam: J.H. de Bussy Ltd.
- Teunissen PA. 1978.** Reconnaissance soil map of Surinam lowland ecosystems. (Coastal Plain and Savanna Belt), Scale: 1/200,000, Sheet 1–8.
- Volkov I, Banavar JR, He F, Hubbell SP, Maritan A. 2005.** Density dependence explains tree species abundance and diversity in tropical forests. *Nature* **438**: 658–661.
- Werkhoven MCM. 1986.** *Orchids of Suriname*. Paramaribo: VACO.



APPENDIX: SPECIES' LIST – BOTANICAL CONSERVATION PRIORITIES IN  
A SURINAME RAINFOREST

## 1. SPERMATOPHYTA

| Family                                | Taxon                                                             | Coll. No. | Veg.            | Herbaria            |
|---------------------------------------|-------------------------------------------------------------------|-----------|-----------------|---------------------|
| ACANTHACEAE                           | <i>Anisacanthus secundus</i> Leonard                              | 8579      | LXF             | CAY, BBS, US        |
|                                       | <i>Anisacanthus secundus</i> Leonard                              | 8008      | LXF             | CAY, L, NY, US, BBS |
|                                       | <i>Anisacanthus secundus</i> Leonard                              | 8190      | LXF             | CAY, L, NY, US, BBS |
|                                       | <i>Aphelandra pulcherrima</i> (Jacq.) Kunth                       | 8042      | IF              | CAY, L, US, BBS     |
|                                       | <i>Hygrophila costata</i> Nees                                    | 8099      | MF              | CAY, BBS            |
|                                       | <i>Justicia calycina</i> (Nees) V.A.W.Graham                      | 8460      | IF              | CAY, BBS, L, K, US  |
|                                       | <i>Mendoncia hoffmannseggiana</i> Nees                            | 8511      | LF              | CAY, BBS, US        |
|                                       | <i>Ruellia rubra</i> Aubl.                                        | 8171      | IF              | CAY, L, US, BBS     |
| ACHARIACEAE                           | <i>Ruellia rubra</i> Aubl.                                        | 8295      | IF              | CAY, US, BBS        |
|                                       | <i>Carpotroche surinamensis</i> Uittien                           | 8358      | IF              | CAY                 |
|                                       | <i>Carpotroche surinamensis</i> Uittien                           | 8469      | MF              | CAY, BBS, L         |
|                                       | cf. <i>Carpotroche</i>                                            | 8056      | MF              | CAY, BBS            |
| AMARYLLIDACEAE                        | <i>Hymenocallis tubiflora</i> Salisb.                             | NC        | IF              |                     |
| ANACARDIACEAE                         | <i>Anacardium spruceanum</i> Benth. ex Engl.                      | 8302      | MF              | CAY                 |
|                                       | cf. <i>Anacardium</i> sp.                                         | NC        | MF              |                     |
|                                       | cf. <i>Loxopterygium</i>                                          | 8538      | LXF             | CAY                 |
|                                       | <i>Loxopterygium sagotii</i> Hook.f.                              | 8249      | LXF             | CAY, L, K, NY, BBS  |
| ANNONACEAE                            | <i>Anaxagorea dolichocarpa</i> Sprague & Sandwith                 | 8287      | IF              | CAY, L, BBS         |
|                                       | <i>Anaxagorea dolichocarpa</i> Sprague & Sandwith                 | 8057      | MF              | CAY, BBS            |
|                                       | <i>Anaxagorea dolichocarpa</i> Sprague & Sandwith                 | 8070      | MF              | CAY, BBS            |
|                                       | <i>Anaxagorea dolichocarpa</i> Sprague & Sandwith                 | 8237      | MF              | CAY, L, US, BBS     |
|                                       | <i>Anaxagorea</i> sp.                                             | 8223      | LXF             | CAY, BBS            |
|                                       | <i>Duguetia calycina</i> Benoist                                  | 8419      | MF              | CAY, BBS            |
|                                       | <i>Duguetia riparia</i> Huber                                     | 8102      | IF              | CAY, L, NY, BBS     |
|                                       | <i>Duguetia riparia</i> Huber                                     | 8162      | IF              | CAY, L, K, NY, BBS  |
|                                       | <i>Duguetia</i> cf. <i>riparia</i> Huber                          | 8216      | IF              | CAY                 |
|                                       | <i>Duguetia</i> sp.                                               | NC        | MF              |                     |
|                                       | <i>Guatteria wachenheimii</i> Benoist                             | 8027      | IF              | CAY, L, BBS         |
|                                       | <b><i>Malmea surinamensis</i></b> Chatrou                         | 8256      | MF-B            | CAY, L, NY, BBS     |
|                                       | <b><i>Malmea surinamensis</i></b> Chatrou                         | NC        | MF              |                     |
|                                       | <b><i>Oxandra surinamensis</i></b> Jans.-Jac.                     | 8120      | IF              | CAY, L, MO, BBS     |
|                                       | <b><i>Oxandra surinamensis</i></b> Jans.-Jac.                     | 8179      | LXF             | CAY, L, BBS         |
|                                       | <b><i>Oxandra surinamensis</i></b> Jans.-Jac.                     | NC        | MF              |                     |
| <i>Unonopsis glaucopetala</i> R.E.Fr. | 8463                                                              | IF        | CAY, BBS, L, US |                     |
| APOCYNACEAE                           | <i>Ambelania acida</i> Aubl.                                      | 8069      | MF              | CAY, P, L, BBS      |
|                                       | <i>Aspidosperma oblongum</i> A.DC.                                | 8039      | MF              | CAY, BBS            |
|                                       | <i>Aspidosperma</i> sp.                                           | NC        | MF              |                     |
|                                       | <i>Geissospermum argenteum</i> Woodson                            | 8483      | MF              | CAY, BBS, P         |
|                                       | <i>Geissospermum</i> sp.                                          | NC        | MF              |                     |
|                                       | <b><i>Himatanthus drasticus</i></b> (Mart.) Plumel                | 8186      | LXF             | CAY, BBS            |
|                                       | <i>Lacmellea aculeata</i> (Ducke) Monach.                         | NC        | MF              |                     |
|                                       | <i>Malouetia tamaquarina</i> (Aubl.) A.DC.                        | 8043      | IF              | CAY, BBS            |
|                                       | <i>Mandevilla scabra</i> (Roem. & Schult.) K.Schum                | 8409      | DXT             | CAY, BBS            |
|                                       | <i>Mandevilla scabra</i> (Hoffmanns. ex Roem. & Schult.) K.Schum. | 8426      | LXF             | CAY, BBS            |
|                                       | <i>Mandevilla symphitocarpa</i> (G. Mey.) Woodson                 | 8459      | MF              | CAY, BBS            |
|                                       | <b><i>Mateleia cremersii</i></b> Morillo                          | 8368      | DXT             | CAY, BBS            |
|                                       | <b><i>Mateleia cremersii</i></b> Morillo                          | 8567      | LXF             | CAY, BBS, MERF      |
|                                       | <b><i>Prestonia cayennensis</i></b> (A. DC.) Pichon               | 8615      | DXT             | CAY, BBS, P         |
|                                       | <i>Prestonia</i> aff. <i>megagros</i> (Vell.) Woodson             | 8108      | MF              | CAY, BBS            |
|                                       | <i>Tabernaemontana albiflora</i> (Miq.) Pulle                     | 8447      | LXF             | CAY, BBS, P         |

APPENDIX *Continued*

| Family     | Taxon                                                     | Coll. No. | Veg.       | Herbaria              |
|------------|-----------------------------------------------------------|-----------|------------|-----------------------|
|            | <i>Tabernaemontana albiflora</i> (Miq.) Pulle             | 8547      | LXF        | CAY, BBS, P           |
|            | <i>Tabernaemontana albiflora</i> (Miq.) Pulle             | 8583      | DXT        | CAY, BBS              |
|            | <i>Tabernaemontana albiflora</i> (Miq.) Pulle             | 8624      | DXT        | CAY, BBS, P           |
|            | <i>Tabernaemontana albiflora</i> (Miq.) Pulle             | 8182      | LXF        | CAY, L, P, BBS        |
|            | <i>Tabernaemontana albiflora</i> (Miq.) Pulle             | 8395      | LXF        | CAY, BBS, L, P        |
|            | <b><i>Tabernaemontana angulata</i></b> Mart. ex Müll.Arg. | 8362      | MF         | CAY                   |
|            | <b><i>Tabernaemontana angulata</i></b> Mart. ex Müll.Arg. | 8276      | MF         | CAY                   |
|            | <i>Tabernaemontana heterophylla</i> Vahl.                 | 8167      | IF         | CAY, L, P, BBS        |
|            | <i>Tabernaemontana macrocalyx</i> Müll.Arg.               | 8528 B    | MF         | CAY, BBS              |
|            | <i>Tabernaemontana undulata</i> Vahl).                    | 8125      | MF         | CAY, L, P, K, NY, BBS |
|            | <i>Tabernaemontana undulata</i> Vahl) .                   | 8215      | IF         | CAY, P, BBS           |
|            | <i>Tabernaemontana</i> sp.                                | NC        | MF         |                       |
| ARACEAE    | <i>Anthurium gracile</i> (Rudge) Schott                   | 8326      | MF         | CAY, BBS              |
|            | <i>Anthurium pentaphyllum</i> (Aubl.) G.Don               | 8270      | MF-B       | CAY                   |
|            | <i>Anthurium trinerve</i> Miq.                            | 8433      | LXF        | CAY, BBS              |
|            | <i>Caladium bicolor</i> (Aiton) Vent.                     | NC        | IF         |                       |
|            | <i>Dieffenbachia</i> sp.                                  | NC        | MF         |                       |
|            | <i>Dieffenbachia paludicola</i> N.E.Br. ex Gleason        | 8118      | IF         | CAY, BBS              |
|            | <i>Philodendron billietiae</i> Croat                      | 8444      | LXF        | CAY, BBS              |
|            | <i>Philodendron billietiae</i> Croat                      | 8456      | LXF        | CAY, BBS              |
|            | <i>Philodendron linnaei</i> Kunth                         | 8525      | DXT        | CAY, BBS              |
|            | <i>Philodendron linnaei</i> Kunth                         | NC        | LXF        |                       |
|            | <i>Philodendron solimoense</i> A.C.Sm.                    | 8280      | MF         | CAY, BBS              |
|            | <i>Philodendron</i> sp. 1                                 | NC        | IF         |                       |
|            | <i>Philodendron</i> sp. 2                                 | NC        | MF-B       |                       |
|            | <i>Philodendron</i> sp. 2                                 | NC        | IF         |                       |
|            | <i>Syngonium podophyllum</i> Schott                       | 8482      | MF         | CAY, BBS, MO          |
|            | <i>Xanthosoma</i> cf. <i>conspurcatum</i> Schott.         | 8510      | IF         | CAY                   |
| ARECACEAE  | <i>Astrocaryum gynacanthum</i> Mart.                      | NC        | MF/IF      |                       |
|            | <i>Astrocaryum sciophilum</i> (Miq.) Pulle                | NC        | MF/IF      |                       |
|            | <b><i>Attalea guianensis</i></b> (Glassman) Zona          | 8630      | MF         | CAY                   |
|            | <i>Attalea maripa</i> (Aubl.) Mart.                       | NC        | MF/IF      |                       |
|            | <i>Attalea microcarpa</i> Mart.                           | NC        | MF/LXF     |                       |
|            | <i>Attalea</i> (s.l.) sp.                                 | 8194      | LXF        | CAY                   |
|            | <i>Bactris acanthocarpa</i> Mart.                         | NC        | MF/IF      |                       |
|            | <i>Bactris maraja</i> Mart.                               | 8142      | IF         | CAY                   |
|            | <i>Bactris maraja</i> Mart.                               | NC        | MF         |                       |
|            | <i>Bactris</i> cf. <i>maraja</i> Mart.?                   | NC        | MF         |                       |
|            | <i>Bactris simplicifrons</i> Mart.                        | NC        | MF/IF      |                       |
|            | <i>Desmoncus</i> cf. <i>polyacanthos</i> Mart.            | NC        | IF         |                       |
|            | <i>Euterpe oleracea</i> Mart.                             | NC        | IF         |                       |
|            | <i>Geonoma baculifera</i> (Poit.) Kunth                   | NC        | IF         |                       |
|            | <i>Geonoma leptospadix</i> Trail                          | 8481      | MF         | CAY, BBS, NY          |
|            | <i>Geonoma maxima</i> (Poit.) Kunth                       | 8620      | MF         | CAY, BBS              |
|            | <i>Geonoma maxima</i> (Poit.) Kunth                       | 8496      | MF         | BBS                   |
|            | <i>Hyospathe elegans</i> Mart.                            | 8294      | IF         | CAY, AA, BBS          |
|            | <i>Hyospathe elegans</i> Mart.                            | 8388      | MF         | CAY                   |
|            | <i>Oenocarpus bacaba</i> Mart.                            | NC        | MF/IF      |                       |
|            | <i>Oenocarpus bataua</i> Mart.                            | NC        | IF         |                       |
|            | <i>Socratea exorrhiza</i> (Mart.) H.Wendl.                | NC        | IF/MF/MF-B |                       |
| ASTERACEAE | <i>Unxia camphorata</i> L.f.                              | 8570      | LXF        | CAY, BBS              |

APPENDIX *Continued*

| Family                                      | Taxon                                                                           | Coll. No.                             | Veg.    | Herbaria                  |                       |
|---------------------------------------------|---------------------------------------------------------------------------------|---------------------------------------|---------|---------------------------|-----------------------|
| BIGNONIACEAE                                | <i>Amphilophium</i> cf. <i>aschersonii</i> Ule                                  | 8474                                  | LXF     | CAY, BBS, L, K, MO        |                       |
|                                             | <i>Anemopaegma</i> cf. <i>chrysoleucum</i> (Kunth) Sandwith                     | 8373                                  | DXT     | CAY, BBS                  |                       |
|                                             | <i>Anemopaegma</i> sp.                                                          | 8036                                  | MF      | CAY, MO, BBS              |                       |
|                                             | cf. <i>Anemopaegma</i> sp.?                                                     | 8512                                  | SV      | CAY, BBS, MO              |                       |
|                                             | <i>Arrabidaea</i> aff. <i>pubescens</i> (L.) A.H.Gentry                         | 8123                                  | MF      | CAY, BBS, L, US, MO, K, B |                       |
|                                             | <i>Arrabidaea</i> <i>trailii</i> Sprague                                        | 8201                                  | MF      | CAY, BBS, L, US, MO, K, B |                       |
|                                             | <i>Ceratophytum tetragonolobum</i> (Jacq.) Sprague & Sandwith                   | 8199                                  | MF      | CAY                       |                       |
|                                             | <i>Lundia erionema</i> DC.                                                      | 8370                                  | DXT     | CAY, BBS, MO              |                       |
|                                             | <i>Memora moringifolia</i> (DC.) Sandwith                                       | NC                                    | MF/MF-B |                           |                       |
|                                             | <i>Memora racemosa</i> A.H.Gentry                                               | 8007                                  | LXF     | CAY, L, K, MO, BBS        |                       |
|                                             | <i>Memora racemosa</i> A.H.Gentry                                               | 8154                                  | MF      |                           |                       |
|                                             | <i>Memora racemosa</i> A.H.Gentry                                               | 8172                                  | IF      | CAY, L, P, K, MO, BBS     |                       |
|                                             | cf. <i>Memora</i>                                                               | 8528 A                                | DXT     | CAY                       |                       |
|                                             | cf. <i>Memora</i> sp.                                                           | NC                                    | MF      |                           |                       |
|                                             | <i>Pithecoctenium crucigerum</i> (L.) A.H.Gentry                                | NC                                    | LF      |                           |                       |
|                                             | <i>Pleonotoma</i> cf. <i>clematis</i> (Kunth) Miers                             | 8105                                  | MF      | CAY, BBS                  |                       |
|                                             | Genus indet.                                                                    | 8153                                  | MF      | CAY, L, BBS               |                       |
|                                             | BORAGINACEAE                                                                    | <i>Cordia laevifrons</i> I.M.Johnston | 8127    | MF                        | CAY, L, K, B, US, BBS |
|                                             |                                                                                 | <i>Cordia laevifrons</i> I.M.Johnston | 8323    | MF                        | CAY, BBS, US          |
|                                             |                                                                                 | <i>Cordia nodosa</i> Lam.             | NC      | MF                        |                       |
| <i>Cordia</i> sp.                           |                                                                                 | 8385                                  | MF      | CAY, BBS                  |                       |
| <i>Tournefortia bicolor</i> Sw.             |                                                                                 | 8079                                  | LXF     | CAY, L, US, BBS           |                       |
| <i>Tournefortia cuspidata</i> Kunth         |                                                                                 | 8597                                  | IF      | CAY, BBS, US, K           |                       |
| <i>Varronia polycephala</i> Lam.            |                                                                                 | 8349                                  | MF      | CAY, BBS, US              |                       |
| <i>Varronia schomburgkii</i> (DC.) Borhidi  |                                                                                 | 8093 B                                | MF      | CAY, L, K, US, BBS        |                       |
| <i>Aechmaea bromeliifolia</i> (Rudge) Baker |                                                                                 | 8400                                  | DXT     | CAY, BBS                  |                       |
| <i>Aechmaea bromeliifolia</i> (Rudge) Baker |                                                                                 | 8490 B                                | DXT     | CAY, BBS                  |                       |
| BROMELIACEAE                                | <i>Aechmaea melinonii</i> Hook.                                                 | 8429                                  | LXF     | CAY, BBS                  |                       |
|                                             | <i>Ananas ananassoides</i> (Baker) L.B.Sm.                                      | 8490 A                                | DXT     | CAY, BBS, L               |                       |
|                                             | <i>Ananas</i> cf. <i>nanus</i> (L.B. Sm.) L.B.Sm.                               | 8454                                  | LXF     | CAY                       |                       |
|                                             | <i>Ananas</i> cf. <i>nanus</i> (L.B. Sm.) L.B.Sm.                               | 8614                                  | DXT     | CAY, BBS                  |                       |
|                                             | <i>Araeococcus micranthus</i> Brongn.                                           | 8397                                  | LXF     | CAY, BBS, L, NY           |                       |
|                                             | <i>Guzmania lingulata</i> (L.) Mez.                                             | 8403                                  | DXT     | CAY, BBS                  |                       |
|                                             | <i>Mesobromelia pleiosticha</i> (Griseb.) Uteley & H.Luther                     | 8601                                  | DXT     | CAY, BBS                  |                       |
|                                             | <i>Pitcairnia</i> cf. <i>leprieurii</i> Baker                                   | NC                                    | IF      |                           |                       |
|                                             | <i>Racinaea spiculosa</i> (Griseb.) var. <i>spiculosa</i> M.A.Spencer & L.B.Sm. | 8602                                  | DXT     | CAY, BBS                  |                       |
|                                             | <i>Tillandsia flexuosa</i> Sw.                                                  | 8493                                  | DXT     | CAY, BBS, L               |                       |
|                                             | <i>Tillandsia monadelphina</i> (E.Morren) Baker                                 | 8137                                  | IF      | CAY, BBS                  |                       |
|                                             | <i>Tillandsia monadelphina</i> (E.Morren) Baker                                 | NC                                    | LXF     |                           |                       |
|                                             | <i>Vriesea heliconioides</i> (Kunth) Hook. ex Walp.                             | 8168                                  | IF      | CAY                       |                       |
|                                             | <i>Vriesea splendens</i> (Brongn.) Lem.                                         | 8473                                  | LXF     | CAY                       |                       |
|                                             | <i>Werauhia</i> aff. <i>gladiolifolia</i> (H.Wendl.) J.R.Grant                  | 8497 A                                | SV      | CAY, BBS                  |                       |
|                                             | BURSERACEAE                                                                     | <i>Protium sagotianum</i> Marchand    | 8265    | IF                        | CAY                   |
| BUXACEAE                                    | <i>Buxus citrifolia</i> (Willd.) Spreng.                                        | 8253                                  | MF-B    |                           |                       |

APPENDIX *Continued*

| Family           | Taxon                                                                               | Coll. No. | Veg. | Herbaria              |
|------------------|-------------------------------------------------------------------------------------|-----------|------|-----------------------|
| CACTACEAE        | <i>Epiphyllum phyllanthus</i> (L.) Haw. var. <i>phyllanthus</i>                     | NC        | LF   |                       |
|                  | <i>Epiphyllum phyllanthus</i> (L.) Haw. var. <i>phyllanthus</i>                     | 8573      | LXF  | CAY, BBS, B           |
| CANNABACEAE      | <i>Celtis iguanaea</i> (Jacq.) Sarg.                                                | 8499      | MF   | CAY, BBS, L           |
|                  | <i>Trema micrantha</i> (L.) Blume                                                   | 8095      | MF   | CAY, L, BBS           |
| CAPPARACEAE      | <i>Capparis flexuosa</i> (L.) L. ssp. <i>polyantha</i> (Triana & Planch.) H.H.Iltis | 8519      | SV   | CAY, BBS, L, WIS      |
|                  | <i>Capparis frondosa</i> Jacq.                                                      | 8613      | DXT  | CAY, BBS              |
|                  | <i>Capparis</i> aff. <i>frondosa</i> Jacq.                                          | 8520      | SV   | CAY, BBS, L, US, WIS  |
|                  | <i>Capparis</i> cf. <i>maroniensis</i> Benoist                                      | 8273      | MF   | CAY, BBS              |
|                  | <i>Capparis sola</i> J.F.Macbr.                                                     | 8598-B    | DXT  | CAY, BBS, WIS, US, L  |
|                  | <i>Capparis</i> sp.                                                                 | 8177      | LXF  | CAY                   |
| CELASTRACEAE     | <i>Maytenus</i> cf. <i>guyanensis</i> Klotzsch ex Reissek                           | 8146      | IF   | CAY, L, US, NY, BBS   |
|                  | <i>Maytenus</i> cf. <i>myrsinoides</i> Reissek                                      | NC        | MF   |                       |
|                  | <i>Peritassa laevigata</i> (Hoffmanns. ex Link) A.C.Sm.                             | 8383      | DXT  | CAY                   |
|                  | <i>Peritassa laevigata</i> (Hoffmanns. ex Link) A.C.Sm.                             | 8413      | DXT  | CAY, BBS              |
|                  | <i>Prionostemma aspera</i> (Lam.) Miers                                             | 8097      | MF   | CAY, L, MO, HRCB, BBS |
|                  | <i>Tontelea cylindrocarpa</i> (A.C.Sm.) A.C.Sm.                                     | 8134      | MF   | CAY, L, BBS           |
| CHRYSOBALANACEAE | <i>Hirtella hispidula</i> Miq.                                                      | 8187      | LXF  | CAY, L, K, BBS        |
|                  | <i>Hirtella paniculata</i> Sw.                                                      | 8115      | IF   | CAY, L, K, NY, BBS    |
|                  | <i>Licania</i> cf. <i>alba</i> (Bernouilli) Cuatrec.                                | 8542      | IF   | CAY                   |
|                  | <i>Licania</i> sp.                                                                  | NC        | MF   |                       |
| CLEOMACEAE       | <i>Cleome aculeata</i> L.                                                           | 8394      | SV   | CAY                   |
| CLUSIACEAE       | <i>Clusia nemorosa</i> G. Mey.                                                      | 8494      | DXT  | CAY, BBS, FTG         |
|                  | <i>Clusia</i> cf. <i>schomburgkiana</i> (Planch. & Triana) Benth. ex Engl.          | 8414      | DXT  | CAY, BBS              |
|                  | <i>Garcinia benthamiana</i> (Planch. & Triana) Pipoly                               | 8274      | MF   | CAY, BBS              |
|                  | <i>Garcinia macrophylla</i> Mart.                                                   | NC        | MF   |                       |
|                  | cf. <i>Moronobea coccinea</i> Aubl.                                                 | NC        | MF   |                       |
|                  | <i>Symphonia globulifera</i> L.f.                                                   | NC        | IF   |                       |
|                  | <i>Tovomita</i> sp.                                                                 | NC        | MF   |                       |
| COMBRETACEAE     | <i>Buchenavia tetraphylla</i> (Aubl.) R.A.Howard                                    | NC        | MF   |                       |
|                  | <i>Terminalia dichotoma</i> G.Mey.                                                  | NC        | IF   |                       |
|                  | <i>Terminalia</i> cf. <i>guyanensis</i> Eichler                                     | 8144      | IF   | CAY, BBS              |
| COMMELINACEAE    | <i>Commelina rufipes</i> Seub. var. <i>glabrata</i> (D.R.Hunt) Faden & D.R.Hunt     | 8166      | IF   | CAY, L, K, US, BBS    |
|                  | <i>Dichorisandra hexandra</i> (Aubl.) Standl.                                       | 8518      | MF   |                       |
| CONNARACEAE      | <i>Cnestidium guianense</i> (G.Schellenb.) G.Schellenb.                             | 8330      | MF   | CAY, BBS, L, US       |
|                  | <i>Connarus patrisii</i> (DC.) Planch.                                              | 8522      | SV   | CAY, BBS              |
|                  | <i>Rourea</i> cf. <i>frutescens</i> Aubl.                                           | 8086      | MF   | CAY, L, BBS           |
|                  | <i>Rourea</i> sp.??                                                                 | 8418      | LXF  | CAY, BBS, COL         |
|                  | <i>Rourea</i> sp.??                                                                 | 8379      | DXT  | CAY, BBS              |
| CONVOLVULACEAE   | <i>Ipomoea phillomega</i> (Vell.) House                                             | 8344      | MF   | CAY, BBS              |
|                  | <i>Maripa</i> cf. <i>densiflora</i> Benth.                                          | 8322      | MF   | CAY, BBS              |
|                  | <i>Maripa reticulata</i> Ducke                                                      | 8192      | LXF  | CAY, BBS              |
|                  | <i>Operculina sericantha</i> (Miq.) Ooststr.                                        | 8498      | IF   | CAY, BBS, ARIZ        |



APPENDIX *Continued*

| Family                         | Taxon                                                                                   | Coll. No.                                 | Veg.  | Herbaria                 |             |
|--------------------------------|-----------------------------------------------------------------------------------------|-------------------------------------------|-------|--------------------------|-------------|
| COSTACEAE                      | <i>Costus claviger</i> Benoist                                                          | 8387                                      | MF    | CAY-BBS                  |             |
|                                | <i>Costus claviger</i> Benoist                                                          | 8325                                      | MF    | CAY-BBS                  |             |
|                                | <i>Costus congestiflorus</i> Rich. ex Gagnep.                                           | 8402                                      | LHF   | CAY                      |             |
|                                | <i>Costus scaber</i> Ruiz & Pav.                                                        | 8160                                      | IF    | CAY-BBS                  |             |
|                                | <b><i>Dimerocostus strobilaceus</i></b> Kuntze ssp.<br><i>gutierrezii</i> (Kuntze) Maas | 8514                                      | LHF   | CAY, BBS, L, NY          |             |
| CUCURBITACEAE                  | <i>Gurania bignoniacea</i> (Poepp. & Endl.)<br>C.Jeffrey ♀ Flowers                      | 8479                                      | LXF   | CAY, BBS, NY             |             |
|                                | <i>Gurania bignoniacea</i> (Poepp. & Endl.)<br>C.Jeffrey ♂ Flowers                      | 8480                                      | LXF   | CAY, BBS, NY             |             |
|                                | <i>Gurania lobata</i> (L.) Pruski                                                       | 8195                                      | MF    | CAY, K, NY, BBS          |             |
|                                | <b><i>Gurania</i></b> aff. <b><i>robusta</i></b> Suess.                                 | 8009                                      | MF    | CAY, L, BBS              |             |
|                                | <i>Gurania subumbellata</i> (Miq.) Cogn.                                                | 8324                                      | MF    | CAY, BBS, L, K, P,<br>NY |             |
|                                | <i>Psiguria triphylla</i> (Miq.) C.Jeffrey                                              | 8159                                      | IF    | CAY, BBS                 |             |
| CYCLANTHACEAE                  | <i>Asplundia brachyphylla</i> Harling                                                   | NC                                        | IF    |                          |             |
| CYPERACEAE                     | <i>Bisboeckelera microcephala</i> (Boeck.)<br>T.Koyama.                                 | NC                                        | IF    |                          |             |
|                                | <i>Calyptracarya bicolor</i> (H. Pfeiff.) T.Koyama                                      | 8251                                      | MF    | CAY, L, P, NY, BBS       |             |
|                                | <i>Calyptracarya glomerulata</i> (Brongn.) Urban                                        | 8540                                      | IF    | CAY, BBS                 |             |
|                                | <i>Diplasia karataefolia</i> Rich.                                                      | 8516                                      | DXT   | CAY, BBS                 |             |
|                                | <i>Diplasia karataefolia</i> Rich.                                                      | NC                                        | MF/IF |                          |             |
|                                | <i>Mapania sylvatica</i> Aubl. ssp. <i>sylvatica</i>                                    | 8098                                      | IF    | CAY, K                   |             |
|                                | <i>Mapania sylvatica</i> Aubl. ssp. <i>sylvatica</i>                                    | NC                                        | MF    |                          |             |
|                                | <i>Rhynchospora cephalotes</i> (L.) Vahl                                                | 8116                                      | IF    | CAY, L, BBS              |             |
|                                | <i>Rhynchospora</i> cf. <i>cephalotes</i> (L.) Vahl                                     | NC                                        | IF    |                          |             |
|                                | <i>Scleria latifolia</i> Sw.                                                            | 8140                                      | IF    | CAY, L, NY, BBS          |             |
|                                | DICHAPETALACEAE                                                                         | <i>Dichapetalum rugosum</i> (Vahl) Prance | 8059  | MF                       | CAY, BBS    |
|                                |                                                                                         | <i>Tapura guianensis</i> Aubl.            | 8049  | MF                       | CAY, L, BBS |
|                                |                                                                                         | <i>Tapura guianensis</i> Aubl.            | 8328  | MF                       | CAY, BBS, K |
| <i>Tapura guianensis</i> Aubl. |                                                                                         | NC                                        | IF    |                          |             |
| DILLENACEAE                    | Genus indet.                                                                            | NC                                        | MF/IF |                          |             |
| DIOSCOREACEAE                  | <i>Dioscorea altissima</i> Lam.                                                         | 8357                                      | MF    | CAY, BBS                 |             |
|                                | <i>Dioscorea piperifolia</i> Humb. & Bonpl. ex<br>Willd.                                | 8406                                      | LXF   | CAY, BBS, L              |             |
|                                | <i>Dioscorea polygonoides</i> Humb. & Bonpl. ex<br>Willd.                               | 8422                                      | LXF   | CAY, BBS, IZTA           |             |
|                                | <i>Dioscorea</i> cf. <i>syringifolia</i> Kunth &<br>R.H.Schomb.                         | 8021                                      | LXF   | CAY, L, BBS              |             |
| ELAEOCARPACEAE                 | <i>Sloanea</i> sp.                                                                      | 8279                                      | LF    | CAY                      |             |
| ERIOCAULACEAE                  | <i>Paepalanthus fasciculatus</i> (Rottb.) Kunth                                         | 8407                                      | DXT   | CAY, BBS, B, F           |             |
| ERYTHROXYLACEAE                | <i>Erythroxylum macrophyllum</i> Cav. var.<br><i>macrophyllum</i>                       | 8327                                      | IF    | CAY, BBS                 |             |
|                                | <i>Erythroxylum squamatum</i> Sw.                                                       | 8175                                      | LXF   | CAY, BBS                 |             |
|                                | <i>Erythroxylum squamatum</i> Sw.                                                       | 8581                                      | DXT   | CAY, BBS, L, NY          |             |
| EUPHORBIACEAE                  | <i>Croton argyrophyloides</i> Müll.Arg.                                                 | 8018                                      | LXF   | CAY-BBS                  |             |
|                                | <i>Croton argyrophyloides</i> Müll.Arg.                                                 | 8448                                      | LXF   | CAY                      |             |
|                                | <i>Croton argyrophyloides</i> Müll.Arg.                                                 | 8586-B                                    | LXF   | CAY, BBS, WIS            |             |
|                                | <b><i>Croton cajucara</i></b> Benth.                                                    | 8180                                      | LXF   | CAY, WIS, BBS            |             |
|                                | <b><i>Croton cajucara</i></b> Benth.                                                    | 8580                                      | LXF   | CAY, BBS, WIS            |             |
|                                | <i>Croton</i> cf. <i>nutians</i> Croizat? (Juvenile form?)                              | 8124                                      | MF    | CAY, BBS                 |             |
|                                | <i>Croton schiedeanus</i> Schltdl.                                                      | 8492                                      | MF    | CAY, BBS, WIS            |             |
|                                | <i>Croton schiedeanus</i> Schltdl.                                                      | 8193                                      | IF    | FC                       |             |

APPENDIX *Continued*

| Family                 | Taxon                                                                                             | Coll. No. | Veg.   | Herbaria             |
|------------------------|---------------------------------------------------------------------------------------------------|-----------|--------|----------------------|
|                        | <i>Croton schiedeanus</i> Schltld.                                                                | 8393      | LF     | CAY                  |
|                        | <i>Croton trinitatis</i> Millsp.                                                                  | 8150      | MF     | CAY, L, BBS          |
|                        | cf. <i>Croton</i>                                                                                 | 8305      | MF     | CAY, BBS             |
|                        | <i>Dalechampia tiliifolia</i> Lam.                                                                | 8084      | MF     | CAY, ALA, BBS        |
|                        | <i>Mabea</i> aff. <i>speciosa</i> Müll.Arg.                                                       | 8015      | MF     | CAY, L, US, BBS      |
|                        | <i>Mabea</i> aff. <i>speciosa</i> Müll.Arg.                                                       | NC        | MF/IF  |                      |
|                        | <i>Manihot</i> cf. <i>anomala</i> Pohl                                                            | 8513      | SV     | CAY, BBS             |
|                        | <i>Manihot</i> sp.                                                                                | 8111      | IF     | CAY                  |
|                        | <i>Maprounea guianensis</i> Aubl.                                                                 | 8411      | DXT    | CAY, BBS, L          |
|                        | <i>Maprounea guianensis</i> Aubl.                                                                 | NC        | MF/LXF |                      |
|                        | <i>Micrandra brownsbergensis</i> Lanj.                                                            | 8421      | LXF    | CAY, BBS, L          |
|                        | <i>Micrandra brownsbergensis</i> Lanj.                                                            | 8535      | LXF    | CAY, BBS, B          |
|                        | <i>Pausandra martinii</i> Baill.                                                                  | 8293      | MF     | CAY, BBS             |
|                        | <i>Pausandra</i> cf. <i>martinii</i> Baill.                                                       | 8058      | MF     | CAY                  |
|                        | <i>Sagotia racemosa</i> Baill.                                                                    | 8001      | LXF    | CAY, L, K, BBS       |
|                        | <i>Sagotia racemosa</i> Baill.                                                                    | 8109      | MF     | CAY, L, BBS          |
|                        | Genera indet.                                                                                     | 8225      | LXF    | CAY                  |
| FABACEAE<br>(CAESALP.) | <b><i>Bauhinia</i></b> cf. <b><i>longicuspis</i></b> Spruce ex Benth.                             | 8291      | MF     | CAY                  |
|                        | <i>Bauhinia siqueiraei</i> Ducke                                                                  | 8000      | LXF    | CAY, L, BBS          |
|                        | <i>Bauhinia siqueiraei</i> Ducke                                                                  | 8278      | LF     | CAY, L, K, US, BBS   |
|                        | <i>Bauhinia siqueiraei</i> Ducke                                                                  | 8352      | MF     | CAY, BBS             |
|                        | <i>Chamaecrista nictitans</i> (L.) Moench cf.var.<br><i>disadena</i> (Steud.) H.S.Irwin & Barneby | 8083      | MF     | CAY, L, NY, BBS      |
|                        | <i>Crudia</i> aff. <i>aromatica</i> (Aubl.) Willd.                                                | 8104      | IF     | CAY, BBS             |
|                        | <i>Crudia</i> aff. <i>aromatica</i> (Aubl.) Willd.                                                | 8241      | MF     | CAY, K, BBS          |
|                        | <i>Crudia</i> aff. <i>aromatica</i> (Hub.) Willd.                                                 | 8267      | IF     | CAY                  |
|                        | <i>Crudia</i> cf. <i>spicata</i> (Aubl.) Willd.                                                   | 8621      | MF     | CAY, BBS             |
|                        | <i>Dimorphandra</i> cf. <i>pullei</i> Amshoff                                                     | 8004 A    | LXF    | CAY, L               |
|                        | <i>Macrolobium</i> cf. <i>angustifolium</i> (Benth.)<br>R.S.Cowan                                 | 8174      | LXF    | CAY, BBS             |
|                        | <i>Mora gonggrijpii</i> (Kleinhoonte) Sandwith                                                    | NC        | MF     |                      |
|                        | <i>Paloue guianensis</i> Aubl.                                                                    | 8354      | MF     | CAY, BBS, L          |
|                        | <i>Peltogyne venosa</i> (Vahl) Benth.                                                             | NC        | IF     |                      |
|                        | <i>Peltogyne paniculata</i> Benth. ssp. <i>pubescens</i><br>(Benth.) M.F.Silva                    | 8006      | LXF    | CAY                  |
|                        | <i>Senna bicapsularis</i> (L.) Roxb.                                                              | 8202      | MF     | CAY, L, K, US, BBS   |
|                        | <i>Senna chrysocarpa</i> (Desv.) H.S.Irwin &<br>Barneby                                           | 8082      | LXF    | CAY, BBS             |
|                        | <i>Senna latifolia</i> (G. Mey.) H.S.Irwin & Barneby                                              | 8093 A    | MF     | CAY, BBS             |
|                        | <b><i>Vouacapoua americana</i></b> Aubl.                                                          | NC        | MF     |                      |
| FABACEAE<br>(MIMOS.)   | <i>Abarema mataybifolia</i> (Sandwith) Barneby &<br>J.W.Grimes                                    | 8521      | SV     | CAY                  |
|                        | <i>Acacia tenuifolia</i> (L.) Willd. var. <i>tenuifolia</i>                                       | 8090      | MF     | CAY, K, L, BBS       |
|                        | <b><i>Calliandra hymenioides</i></b> (Rich.) Benth.                                               | 8416      | LXF    | CAY, P, L, K, NY, US |
|                        | <i>Cedrelinga cateniformis</i> (Ducke) Ducke                                                      | NC        | MF     |                      |
|                        | <i>Inga alba</i> (Sw.) Willd.                                                                     | NC        | MF     |                      |
|                        | <i>Inga retinocarpa</i> Poncy                                                                     | 8277      | MF     | CAY, BBS             |
|                        | <i>Inga stipularis</i> DC.                                                                        | 8243      | LXF    | CAY                  |
|                        | <i>Inga stipularis</i> DC.                                                                        | 8371      | DXT    | CAY, BBS, P          |
|                        | <i>Inga stipularis</i> DC.                                                                        | 8472      | MF     | CAY, BBS, P          |
|                        | <i>Inga stipularis</i> DC.                                                                        | NC        | LXF    |                      |
|                        | <i>Inga</i> cf. <i>umbellifera</i> (Vahl) Steud ex DC.                                            | 8176      | LXF    | CAY, P, BBS          |
|                        | <i>Inga</i> cf. <i>virgultosa</i> (Vahl) Desv.                                                    | 8222      | LXF    | CAY                  |
|                        | <i>Inga</i> cf. <i>virgultosa</i> (Vahl) Desv.                                                    | 8226      | LXF    | CAY, L, P, K, BBS    |

APPENDIX *Continued*

| Family                  | Taxon                                                                                | Coll. No. | Veg. | Herbaria                  |
|-------------------------|--------------------------------------------------------------------------------------|-----------|------|---------------------------|
|                         | <i>Inga cf. virgultosa</i> (Vahl) Desv.                                              | NC        | MF   |                           |
|                         | <i>Mimosa</i> sp.                                                                    | NC        | IF   |                           |
|                         | <i>Pithecellobium</i> sp.                                                            | 8004 B    | LXF  | CAY, L                    |
|                         | <i>Pseudopiptadenia cf. psilostachya</i> (DC.)<br>G.P.Lewis & M.P.Lima               | 8333      | MF   | CAY, BBS                  |
|                         | <i>Zygia racemosa</i> (Ducke) Barneby &<br>J.W.Grimes                                | 8052      | MF   | CAY, BBS                  |
| FABACEAE<br>(PAPILION.) | <i>Alexa wachenheimii</i> Benoist                                                    | 8495 A    | IF   | CAY, BBS, K               |
|                         | <i>Andira</i> sp.                                                                    | NC        | MF   |                           |
|                         | <b><i>Bocoa prouacensis</i></b> Aubl.                                                | NC        | MF   |                           |
|                         | <b><i>Bocoa viridiflora</i></b> (Ducke) R.S.Cowan                                    | 8005      | LXF  | CAY, L, BBS               |
|                         | <b><i>Bocoa viridiflora</i></b> (Ducke) R.S.Cowan                                    | 8533      | MF   | CAY, BBS                  |
|                         | <i>Bocoa</i> sp.                                                                     | NC        | IF   |                           |
|                         | <i>Candolleodendron brachystachyum</i> (DC.)<br>R.S.Cowan                            | 8275      | MF   | CAY                       |
|                         | <i>Centrosema plumieri</i> (Turpin ex Pers.) Benth                                   | 8206      | IF   | CAY                       |
|                         | <i>Clitoria sagotii</i> Fantz                                                        | 8332      | IF   | CAY, BBS                  |
|                         | <i>Dioclea scabra</i> (Rich.) R.H.Maxwell var.<br><i>scabra</i>                      | 8152      | MF   | CAY, L, K, BBS            |
|                         | <i>Dioclea macrocarpa</i> Huber                                                      | 8122      | MF   | CAY, BBS                  |
|                         | <i>Lonchocarpus cf. heptaphyllus</i> (Poir.) DC.                                     | NC        | MF   |                           |
|                         | <i>Machaerium quinatum</i> (Aubl.) Sandwith var.<br><i>parviflorum</i> (Benth.) Rudd | 8307      | FDH  | CAY                       |
|                         | <i>Mucuna urens</i> (L.) Medik                                                       | 8158      | MF   | CAY, BBS                  |
|                         | <i>Pterocarpus officinalis</i> Jacq.                                                 | NC        | IF   |                           |
|                         | <i>Pterocarpus santalinoides</i> L'Hér. ex DC.                                       | 8156      | MF   | CAY, L, P, K, BBS         |
|                         | <i>Rhynchosia phaseoloides</i> (Sw.) DC.                                             | 8089      | MF   | CAY, K, BBS               |
|                         | <i>Rhynchosia</i> sp.                                                                | 8133      | MF   | CAY, L, K, BR, NY,<br>BBS |
|                         | <i>Swartzia arborescens</i> (Aubl.) Pittier                                          | 8064      | MF   | CAY, BBS                  |
|                         | <i>Swartzia benthamiana</i> Miq.                                                     | NC        | MF   |                           |
|                         | <i>Swartzia grandifolia</i> Bong. ex Benth.                                          | 8334      | MF   | CAY, BBS                  |
|                         | <i>Swartzia cf. schomburgkii</i> Benth.                                              | NC        | MF   |                           |
|                         | <b><i>Swartzia panacoco</i></b> (Aubl.) R.S.Cowan                                    | NC        | MF   |                           |
|                         | <b><i>Vigna caracalla</i></b> (L.) Verde                                             | 8384      | SV   | CAY, BBS, K, NY           |
| GENTIANACEAE            | <i>Voyria caerulea</i> Aubl.                                                         | 8053      | MF   | CAY                       |
| GESNERIACEAE            | <i>Drymonia coccinea</i> (Aubl.) Wiehler                                             | 8299      | IF   | CAY                       |
|                         | <i>Paradrymonia cf. campostyla</i> (Leeuwenb.)<br>Wiehler                            | 8298      | IF   | CAY, BBS                  |
| GNETACEAE               | <i>Gnetum urens</i> (Aubl.) Blume                                                    | 8306      | MF   | CAY, L, K, NY, BBS        |
| GOUPIACEAE              | <i>Goupia glabra</i> Aubl.                                                           | NC        | IF   |                           |
| HAEMODORACEAE           | <i>Xiphidium caeruleum</i> Aubl.                                                     | 8065      | IF   | CAY, L, BBS               |
|                         | <i>Xiphidium caeruleum</i> Aubl.                                                     | NC        | IF   |                           |
| HELICONIACEAE           | <i>Heliconia acuminata</i> Rich. ssp. <i>acuminata</i>                               | 8092      | MF   | CAY, L, BBS               |
|                         | <i>Heliconia acuminata</i> Rich. ssp. <i>acuminata</i>                               | NC        | IF   |                           |
|                         | <i>Heliconia bihai</i> (L.) L.                                                       | 8343      | MF   | CAY                       |
|                         | <i>Heliconia bihai</i> (L.) L.                                                       | NC        | IF   |                           |
|                         | <i>Heliconia chartacea</i> Lane ex Barreiros                                         | 8501      | IF   | CAY, BBS                  |
|                         | <i>Heliconia hirsuta</i> L.f.                                                        | 8130      | MF   | CAY, L, NY, BBS           |
|                         | <i>Heliconia hirsuta</i> L.f.                                                        | NC        | IF   |                           |
|                         | <b><i>Heliconia lourteigiae</i></b> Emygdio & E.Santos                               | 8163      | IF   | CAY, L, BBS               |
|                         | <b><i>Heliconia lourteigiae</i></b> Emygdio & E.Santos                               | 8500      | LHF  | CAY, BBS, P, L, US        |
|                         | <i>Heliconia richardiana</i> Miq.                                                    | 8203      | IF   | CAY                       |

APPENDIX *Continued*

| Family        | Taxon                                                           | Coll. No. | Veg. | Herbaria                         |
|---------------|-----------------------------------------------------------------|-----------|------|----------------------------------|
|               | <i>Heliconia richardiana</i> Miq.                               | NC        | MF   |                                  |
|               | <i>Heliconia spathocircinata</i> Aristeg.                       | NC        | IF   |                                  |
| HYPERICACEAE  | <i>Vismia cayennensis</i> (Jacq.) Pers.                         | 8198      | MF   | CAY, L, BBS                      |
| ICACINACEAE   | <b><i>Pleurisanthes artocarp</i></b> Baill.                     | 8476      | MF   | CAY, BBS                         |
| LAMIACEAE     | <i>Aegiphila racemosa</i> Vell.                                 | 8497 B    | MF   | CAY, BBS, L                      |
|               | <i>Aegiphila villosa</i> (Aubl.) G.F.Gmel.                      | 8548      | IF   | CAY, BBS, L, K, US               |
|               | <i>Vitex compressa</i> Turcz.                                   | 8272      | MF-B | CAY, BBS                         |
|               | <i>Vitex cf. compressa</i> Turcz.                               | NC        | MF-B |                                  |
|               | <i>Vitex triflora</i> Vahl                                      | 8321      | IF   | CAY, BBS, L                      |
|               | <i>Vitex triflora</i> Vahl                                      | 8571      | IF   | CAY, BBS, L                      |
| LAURACEAE     | <i>Aniba megaphylla</i> Mez                                     | 8508      | IF   | CAY, BBS, MO                     |
|               | cf. <i>Aniba</i> sp.?                                           | 8550      | IF   | CAY                              |
|               | <i>Endlicheria</i> sp.?                                         | 8361      | MF   | CAY, BBS, MO                     |
| LECYTHIDACEAE | <i>Couratari stellata</i> A.C.Sm.                               | NC        | MF   |                                  |
|               | <i>Couratari</i> sp.                                            | NC        | MF   |                                  |
|               | <i>Eschweilera pedicellata</i> (Rich.) S.A.Mori                 | 8173      | IF   | CAY, L, P, NY, BBS               |
|               | <i>Eschweilera aff. pedicellata</i> (Rich.) S.A.Mori            | 8263      | IF   | CAY, BBS                         |
|               | <i>Eschweilera</i> sp.                                          | NC        | MF   |                                  |
|               | <i>Lecythis zabucajo</i> Aubl.                                  | NC        | MF   |                                  |
| LOGANIACEAE   | <i>Spigelia hamelioides</i> Kunth                               | 8296      | IF   | CAY, U, P, B, NY,<br>MO, BBS     |
|               | <i>Strychnos erichsonii</i> M.R.Schomb. ex Progel               | 8390      | LF   | CAY, BBS                         |
|               | <i>Strychnos cf. erichsonii</i> M.R.Schomb. ex Progel           | 8073      | MF   | CAY                              |
|               | <i>Strychnos eugeniifolia</i> Monach.                           | 8063      | MF   | CAY, BBS                         |
|               | <i>Strychnos medeola</i> Sagot ex Progel                        | 8020      | LXF  | CAY, BBS                         |
|               | <i>Strychnos medeola</i> Sagot ex Progel                        | 8410      | DXT  | CAY, BBS, L, US                  |
|               | <i>Strychnos medeola</i> Sagot ex Progel                        | NC        | MF   |                                  |
| LORANTHACEAE  | <i>Phthirusa stelis</i> (L.) Kuijt                              | 8233      | LXF  | CAY, NY, BBS                     |
|               | <i>Phthirusa stelis</i> (L.) Kuijt                              | 8380      | DXT  | CAY, BBS                         |
| MALPIGHIACEAE | <i>Bunchosia argentea</i> (Jacq.) DC.                           | 8165      | IF   | CAY, L, BBS                      |
|               | <i>Byrsonima cf. laevigata</i> (Poir.) DC.                      | NC        | LXF  |                                  |
|               | <b><i>Byrsonima surinamensis</i></b> W.R.Anderson               | 8364      | DXT  | CAY, BBS, MICH                   |
|               | <b><i>Byrsonima surinamensis</i></b> W.R.Anderson               | 8452      | LXF  | CAY, BBS, MICH                   |
|               | <b><i>Byrsonima surinamensis</i></b> W.R.Anderson               | 8565      | LXF  | CAY, BBS, K, L, US,<br>MICH      |
|               | <b><i>Byrsonima surinamensis</i></b> W.R.Anderson               | 8582      | DXT  | CAY, BBS, MICH                   |
|               | <i>Heteropterys nervosa</i> A.Juss.                             | 8244      | LXF  | CAY, BBS                         |
|               | <i>Hiraea affinis</i> Miq.                                      | 8503      | IF   | CAY, BBS, L, P,<br>MICH          |
|               | <i>Hiraea fagifolia</i> (DC.) A.Juss.                           | 8386      | LF   | CAY, BBS, MICH                   |
|               | <b><i>Mascagnia surinamensis</i></b> (Kosterm.)<br>W.R.Anderson | 8091      | MF   | CAY, L, K, NY,<br>MICH, BBS, WRA |
|               | <b><i>Mezia includens</i></b> (Benth.) Cuatrec.                 | 8478      | MF   | CAY, BBS, L, MICH                |
|               | <i>Stigmaphyllon convolvulifolium</i> A.Juss.                   | 8106      | MF   | CAY, L, B, K, US,<br>MICH, BBS   |
|               | <i>Stigmaphyllon sinuatum</i> (DC.) A.Juss.                     | 8081      | LXF  | CAY, L, MICH, BBS                |
|               | <i>Tetrapterys styloptera</i> A.Juss.                           | 8231      | LXF  | CAY, L, US, HRCB,<br>BBS         |
|               | Genus indet.                                                    | 8060      | MF   | CAY                              |
| MALVACEAE     | <i>Apeiba glabra</i> Aubl.                                      | NC        | MF   |                                  |
|               | <i>Apeiba petoumo</i> Aubl.                                     | NC        | IF   |                                  |
|               | cf. <i>Bombax</i> sp.                                           | 8453      | LXF  | CAY                              |
|               | <b><i>Pachira dolichocalyx</i></b> Robyns                       | 8103      | MF   | CAY, L, B, BBS                   |



APPENDIX *Continued*

| Family           | Taxon                                                                    | Coll. No. | Veg.  | Herbaria                   |
|------------------|--------------------------------------------------------------------------|-----------|-------|----------------------------|
|                  | <i>Sterculia pruriens</i> (Aubl.) K.Schum.                               | 8268      | IF    | CAY                        |
|                  | <i>Sterculia cf. pruriens</i> (Aubl.) K.Schum.                           | NC        | MF    |                            |
| MARANTACEAE      | <b><i>Theobroma subincanum</i></b> Mart.                                 | 8504      | SV    | CAY, BBS, US               |
|                  | <i>Calathea altissima</i> (Poepp. & Endl.) Körn.                         | NC        | IF    |                            |
|                  | <i>Calathea elliptica</i> (Roscoe) K.Schum.                              | 8389      | LF    | CAY, BBS                   |
|                  | <i>Calathea elliptica</i> (Roscoe) K.Schum.                              | NC        | IF/MF |                            |
|                  | <i>Calathea zingiberina</i> Körn.                                        | 8114      | IF    | CAY, BBS                   |
|                  | <i>Calathea zingiberina</i> Körn.                                        | NC        | MF    |                            |
|                  | <i>Hylaeantha unilateralis</i> (Poepp. & Endl.)<br>A.M.E.Jonker & Jonker | 8506 A    | IF    | CAY, BBS, UMF, B           |
|                  | <i>Ischnosiphon arouma</i> (Aubl.) Körn.                                 | 8303      | MF    | CAY, BBS                   |
|                  | <i>Ischnosiphon arouma</i> (Aubl.) Körn.                                 | NC        | IF    |                            |
|                  | <i>Ischnosiphon gracilis</i> (Rudge) Körn.                               | 8537      | IF    | CAY, BBS                   |
|                  | <i>Ischnosiphon obliquus</i> (Rudge) Körn.                               | NC        | IF    |                            |
|                  | <i>Ischnosiphon puberulus</i> Loes.                                      | NC        | IF/MF |                            |
|                  | <b><i>Monotagma secundum</i></b> (Petersen) K.Schum.                     | 8502      | LHF   | CAY, BBS                   |
| MARCGRAVIACEAE   | <i>Monotagma spicatum</i> (Aubl.) J.F.Macbr.                             | 8259      | IF    | CAY, BBS                   |
|                  | <i>Marcgravia pedunculosa</i> Triana & Planch..                          | 8235      | IF    | CAY, BBS                   |
|                  | <i>Norantea guianensis</i> Aubl.                                         | 8515      | DXT   | CAY, BBS, L                |
| MAYACACEAE       | <i>Mayaca longipes</i> Mart. ex Seub.                                    | 8242      | A     | CAY                        |
| MELASTOMATAACEAE | <i>Aciotis purpurascens</i> (Aubl.) Triana                               | 8161      | IF    | CAY, L, NY, BBS            |
|                  | <i>Aciotis aff. rubricaulis</i> (Schrank & Mart. ex<br>DC.) Triana       | 8038      | MF    | CAY, L, US, BBS            |
|                  | <i>Clidemia conglomerata</i> DC.                                         | 8034      | IF    | CAY, BBS                   |
|                  | <i>Henriettella caudata</i> Gleason                                      | 8028      | IF    | CAY, P, L, NY, BBS         |
|                  | <i>Miconia cf. affinis</i> DC.                                           | 8037      | MF    | CAY, L, US, BBS            |
|                  | <i>Miconia chrysophylla</i> (Rich.) Urb.                                 | 8598-A    | DXT   | CAY, BBS, US               |
|                  | <i>Miconia lateriflora</i> Cogn.                                         | 8470      | MF    | CAY, BBS, US               |
|                  | <i>Miconia plukenetii</i> Naudin                                         | NC        | IF    |                            |
|                  | <i>Miconia prasina</i> (Sw.) DC.                                         | 8467      | MF    | CAY, BBS, P, US            |
| MELIACEAE        | <i>Trichilia cf. surinamensis</i> (Miq.) C.DC.                           | 8178      | LXF   | CAY, BBS                   |
| MENISPERMACEAE   | <i>Abuta rufescens</i> Aubl.                                             | 8072      | MF    | CAY                        |
|                  | <i>Abuta rufescens</i> Aubl.                                             | 8339      | IF    | CAY, BBS                   |
|                  | <i>Cissampelos fasciculata</i> Benth.                                    | 8568      | MF-B  | CAY, BBS, B                |
|                  | <i>Curarea candicans</i> (Rich. ex DC.) Barneby &<br>Krukoff             | NC        | MF/IF |                            |
|                  | <i>Disciphania</i> sp.?                                                  | 8405      | LXF   | CAY, BBS, B, MO            |
|                  | <i>Orthomene schomburgkii</i> (Miers) Barneby &<br>Krukoff               | 8468      | SV    | CAY, BBS, US               |
|                  | <i>Sciadotenia cayennensis</i> Benth.                                    | 8626      |       | CAY, BBS, P, L, B,<br>US   |
| MORACEAE         | <i>Bagassa guianensis</i> Aubl.                                          | 8035      | MF    | CAY, BBS                   |
|                  | <i>Brosimum rubescens</i> Taub.                                          | NC        | MF    |                            |
|                  | <i>Brosimum</i> sp.                                                      | NC        | MF    |                            |
|                  | <i>Ficus nymphaeifolia</i> Mill.                                         | NC        | MF    |                            |
| MYRISTICACEAE    | <i>Iryanthera hostmannii</i> (Benth.) Warb.                              | 8618      | LXF   | CAY, BBS, P, L, US         |
|                  | <i>Virola cf. michelii</i> Heckel                                        | NC        | MF    |                            |
| MYRTACEAE        | <b><i>Calycorectes batavorum</i></b> McVaugh                             | 8229      | LXF   | CAY, L, K, US, SEL,<br>BBS |
|                  | <i>cf. Calyptanthes forsteri</i> O.Berg?                                 | 8423      | LXF   | CAY, SEL                   |
|                  | <i>Calyptanthes pullei</i> Burret ex Amshoff                             | 8396      | LXF   | CAY, BBS, SEL              |
|                  | <i>Eugenia cucullata</i> Amshoff                                         | 8543      | LXF   | CAY, BBS, SEL              |
|                  | <b><i>Eugenia excelsa</i></b> O.Berg                                     | 8628      | LXF   | CAY, BBS, SEL              |

APPENDIX *Continued*

| Family        | Taxon                                                                                           | Coll. No. | Veg. | Herbaria                  |
|---------------|-------------------------------------------------------------------------------------------------|-----------|------|---------------------------|
|               | <i>Eugenia</i> aff. <i>feijoi</i> O.Berg                                                        | 8348      | MF   | CAY, BBS, K, SEL          |
|               | <i>Eugenia</i> aff. <i>feijoi</i> O.Berg                                                        | 8457      | MF   | CAY, BBS, SEL             |
|               | <i>Eugenia macrocalyx</i> (Rusby) Mc Vaugh                                                      | 8181      | LXF  | CAY, L, BBS               |
|               | <i>Eugenia macrocalyx</i> (Rusby) McVaugh                                                       | 8392      | LF   | CAY, SEL                  |
|               | <i>Eugenia patrisii</i> Vahl                                                                    | 8629      | LXF  | CAY, BBS                  |
|               | <i>Eugenia</i> cf. <i>ramiflora</i> Desv.                                                       | 8544      | LXF  | CAY, BBS                  |
|               | <i>Eugenia wulschlaegeliana</i> Amshoff                                                         | 8353      | SV   | CAY, BBS, SEL             |
|               | <i>Eugenia wulschlaegeliana</i> Amshoff                                                         | 8539      | LXF  | CAY, BBS, SEL-K           |
|               | cf. <i>Eugenia</i> sp. 1                                                                        | 8545      | LXF  | CAY, BBS, SEL             |
|               | <i>Myrcia citrifolia</i> (Aubl.) Urb.                                                           | 8608      | DXT  | CAY, BBS, P, K, L,<br>SEL |
|               | <i>Myrcia guianensis</i> (Aubl.) DC.                                                            | 8378      | DXT  | CAY, BBS, SEL             |
|               | <i>Myrcia</i> aff. <i>pyrifolia</i> (Desv. ex Ham.) Nied.                                       | 8446      | LXF  | CAY, BBS                  |
|               | <i>Myrcia</i> aff. <i>pyrifolia</i> (Desv. ex Ham.) Nied.                                       | 8523      | DXT  | CAY, BBS, SEL             |
|               | <i>Myrcia saxatilis</i> (Amshoff) McVaugh                                                       | 8367      | DXT  | CAY, BBS, SEL             |
|               | <i>Myrcia saxatilis</i> (Amshoff) McVaugh                                                       | 8489      | DXT  | CAY, BBS, K               |
|               | <i>Myrcia sylvatica</i> (G.Mey.) DC.                                                            | 8527 A    | DXT  | CAY                       |
|               | <i>Myrcianthes prodigiosa</i> McVaugh                                                           | 8617      | DXT  | CAY, BBS                  |
|               | Genus indet.                                                                                    | 8269      | MF-B | CAY, BBS                  |
|               | Genus indet.                                                                                    | NC        | LXF  |                           |
|               | Genus indet.                                                                                    | 8526 A    | DXT  | CAY                       |
| NYCTAGINACEAE | <b><i>Neea</i> cf. <i>constricta</i></b> Spruce ex J.A.Schmidt                                  | 8572      | LXF  | CAY, BBS, K, MO           |
| OCHNACEAE     | cf. <i>Elvasia elvasioides</i> (Planch.) Gilg                                                   | 8220      | LXF  | CAY                       |
|               | <i>Ouratea leblondii</i> (Tiegh.) Lemée                                                         | 8369      | DXT  | CAY, BBS, P               |
|               | <i>Ouratea leblondii</i> (Tiegh.) Lemée                                                         | 8372      | DXT  | CAY, BBS, P               |
|               | <i>Ouratea leblondii</i> (Tiegh.) Lemée                                                         | 8420      | LXF  | CAY, BBS                  |
|               | <b><i>Ouratea schomburghii</i></b> (Planch.) Engl. vel<br><b><i>Ouratea rigida</i></b> Engl.    | 8604      | DXT  | CAY, BBS                  |
|               | <b><i>Quiina</i> aff. <i>wurdackii</i></b> Pires?                                               | 8376      | DXT  | CAY, BBS, MO              |
|               | <b><i>Quiina</i> aff. <i>wurdackii</i></b> Pires?                                               | 8487      | DXT  | CAY, BBS                  |
|               | <b><i>Quiina</i> aff. <i>wurdackii</i></b> Pires?                                               | 8488      | DXT  | CAY                       |
| OLACACEAE     | <i>Heisteria cauliflora</i> Sm.                                                                 | 8236      | IF   | CAY, L, B, US, BBS        |
|               | <b><i>Heisteria</i> cf. <i>insculpta</i></b> Sleumer                                            | 8016      | MF   | CAY, BBS                  |
|               | <i>Minuartia guianensis</i> Aubl.                                                               | NC        | MF   |                           |
|               | <i>Ximena americana</i> L. var. <i>americana</i>                                                | 8428      | LXF  | CAY, BBS, L, US           |
| ONAGRACEAE    | <i>Ludwigia</i> sp.                                                                             | 8264      | A    | CAY                       |
| ORCHIDACEAE   | <i>Brassia lawrenceana</i> Lindl.                                                               | 8596      | DXT  | CAY, BBS, MO              |
|               | <i>Elleanthus</i> cf. <i>caravata</i> (Aubl.) Rchb.f.                                           | 8434      | LXF  | CAY                       |
|               | <i>Epidendrum purpurascens</i> H.Focke                                                          | 8449      | LXF  | CAY                       |
|               | <i>Gongora</i> sp.                                                                              | 8430      | LXF  | CAY, BBS                  |
|               | <i>Heterotaxis villosa</i> (Barb. Rodr.) F.Barros                                               | 8432      | LXF  | CAY                       |
|               | <i>Jacquinella globosa</i> (Jacq.) Schltr.                                                      | 8435 A    | LXF  | CAY                       |
|               | <i>Koellensteinia kellneriana</i> Rchb.f.                                                       | 8458      | LXF  | CAY                       |
|               | <i>Macradenia lutescens</i> R.Br.                                                               | 8401      | LHF  | CAY, BBS                  |
|               | <i>Maxillaria alba</i> (Hook.) Lindl.                                                           | 8436      | LXF  | CAY, BBS                  |
|               | <i>Maxillaria discolor</i> (Lodd. ex Lindl.) Rchb.f.                                            | 8442      | LXF  | CAY                       |
|               | <i>Maxillaria uncata</i> Lindl.                                                                 | 8440      | LXF  | CAY, BBS                  |
|               | <b><i>Palmorchis prospectorum</i></b> Veyret or<br><i>P. pubescens</i> Barb. Rodr.              | 8068      | IF   | CAY, BBS                  |
|               | <b><i>Palmorchis pabstii</i></b> Veyret or <i>P. guianensis</i><br>(Schltr.) Schweinf. & Correl | 8054      | MF   | CAY                       |
|               | <i>Pleurothallis archidiaconi</i> Ames                                                          | 8609      | DXT  | CAY, BBS                  |
|               | <i>Polystachya concreta</i> (Jacq.) Garay &<br>H.R.Sweet                                        | 8441      | LXF  | CAY                       |

APPENDIX *Continued*

| Family         | Taxon                                                                         | Coll. No. | Veg. | Herbaria                   |
|----------------|-------------------------------------------------------------------------------|-----------|------|----------------------------|
|                | <i>Polystachya amazonica</i> Schltr.                                          | 8022      | LXF  | BBS                        |
|                | <i>Prosthechea aemula</i> (Lindl.) W.E.Higgins.                               | 8431      | LXF  | CAY                        |
|                | <i>Scaphyglottis</i> cf. <i>graminifolia</i> (Ruiz & Pav.)<br>Poepp. & Endl.. | 8435 B    | LXF  | CAY                        |
|                | <i>Scaphyglottis</i> sp.                                                      | 8438      | LXF  | CAY, BBS                   |
|                | <i>Schomburgkia marginata</i> Lindl.                                          | 8524      | DXT  | CAY, BBS                   |
|                | <i>Stanhopea grandiflora</i> (Lodd.) Lindl.                                   | 8491 A    | DXT  | CAY, BBS                   |
|                | <i>Stelis argentata</i> Lindl.                                                | 8437      | LXF  | CAY, BBS                   |
|                | <b><i>Stelis santiagoensis</i></b> Mansf.                                     | 8610      | DXT  | CAY, BBS                   |
|                | <b><i>Vanilla</i></b> sp.                                                     | 8517      | MF   | CAY, BBS, MO,<br>CICY      |
| OXALIDACEAE    | <b><i>Oxalis juruensis</i></b> Diels                                          | 8204      | IF   | CAY, L, NY, BBS            |
| PASSIFLORACEAE | <i>Dilkea</i> sp.                                                             | 8363      | MF   | CAY, BBS                   |
|                | <i>Dilkea</i> sp.                                                             | 8477      | LXF  | CAY, BBS, US               |
|                | <i>Passiflora amoena</i> L.K.Escobar                                          | 8560      | MF-B | CAY, BBS                   |
|                | <i>Passiflora coccinea</i> Aubl.                                              | 8085      | MF   | CAY, BBS                   |
|                | <i>Passiflora fuchsiiflora</i> Hemsl.                                         | 8129      | MF   | CAY, L, P, US, BBS         |
|                | <i>Passiflora fuchsiiflora</i> Hemsl.                                         | NC        | IF   |                            |
|                | <i>Passiflora garckeii</i> Masters                                            | 8350      | SV   | CAY, BBS, US               |
|                | <i>Passiflora</i> cf. <i>garckeii</i> Mast.                                   | 8107      | MF   | CAY, L, US, BBS            |
|                | <i>Passiflora</i> cf. <i>garckeii</i> Mast.                                   | NC        | LXF  |                            |
|                | <i>Passiflora glandulosa</i> Cav.                                             | 8290      | LF   | CAY, BBS                   |
|                | <i>Passiflora laurifolia</i> L.                                               | 8382      | DXT  | CAY, BBS                   |
|                | <i>Passiflora laurifolia</i> L.                                               | 8464      | MF   | CAY, BBS                   |
|                | <b><i>Passiflora</i></b> cf. <b><i>oerstedii</i></b> Mast.                    | 8356      | MF   | CAY, BBS, US               |
|                | <i>Passiflora retipetala</i> Mast.                                            | 8564      | LXF  | CAY, BBS, US               |
|                | <i>Passiflora rubra</i> L.                                                    | 8205      | IF   | CAY, BBS                   |
|                | <i>Passiflora serrato-digitata</i> L.                                         | 8600      | IF   | CAY, BBS, US               |
|                | <i>Passiflora vespertilio</i> L.                                              | 8029      | IF   | CAY, BBS                   |
|                | <i>Passiflora vespertilio</i> L.                                              | 8066      | IF   | CAY                        |
|                | <i>Passiflora vespertilio</i> L.                                              | 8451      | LXF  | CAY                        |
|                | <i>Passiflora vespertilio</i> L.                                              | 8465      | MF   | CAY, BBS                   |
|                | <i>Turnera rupestris</i> Aubl.                                                | 8044      | IF   | CAY, L, US, STR,<br>BBS    |
|                | <i>Turnera rupestris</i> Aubl.                                                | 8563      | MF-B | CAY, BBS, P                |
|                | <i>Turnera rupestris</i> Aubl.                                                | 8577      | LXF  | CAY, BBS, P                |
|                | <i>Turnera</i> cf. <i>rupestris</i> Aubl.                                     | 8594      | DXT  | CAY, BBS                   |
| PICRAMNACEAE   | <i>Picramnia guianensis</i> (Aubl.) Jans.-Jac.                                | 8040      | MF   | CAY, L, NY, BBS            |
|                | <i>Picramnia guianensis</i> (Aubl.) Jans.-Jac.                                | 8534      | LXF  | CAY, BBS, NY               |
|                | <i>Picramnia latifolia</i> Tulasne                                            | 8200      | MF   | CAY, L, P, K, NY,<br>BBS   |
| PIPERACEAE     | <i>Peperomia glabella</i> (Sw.) A.Dietr.                                      | 8292      | LF   | CAY, L, P, US, HUA,<br>BBS |
|                | <i>Peperomia macrostachya</i> (Vahl) A.Dietr.                                 | 8576      | LXF  | CAY, BBS, L                |
|                | <i>Piper anonifolium</i> (Kunth) C.DC.                                        | 8170      | IF   | CAY, L, BBS                |
|                | <i>Piper anonifolium</i> (Kunth) C.DC.                                        | 8217      | IF   | CAY, L, BBS                |
|                | <i>Piper</i> cf. <i>anonifolium</i> (Kunth) C.DC.                             | NC        | IF   |                            |
|                | <i>Piper arboreum</i> Aubl.                                                   | 8301      | IF   | CAY, L, US, HUA,<br>BBS    |
|                | <i>Piper arboreum</i> Aubl.                                                   | 8398      | LHF  | CAY, BBS, L                |
|                | <i>Piper</i> cf. <i>arboreum</i> Aubl.                                        | 8262      | IF   | CAY                        |
|                | <i>Piper bartlingianum</i> (Miq.) C.DC.                                       | 8075      | MF   | CAY, L, BBS                |
|                | <i>Piper bartlingianum</i> (Miq.) C.DC.                                       | 8250      | MF   | CAY, BBS                   |
|                | <i>Piper demeraranum</i> (Miq.) C.DC.                                         | 8141      | IF   | CAY, L, BBS                |

APPENDIX *Continued*

| Family         | Taxon                                                            | Coll. No. | Veg.  | Herbaria                     |
|----------------|------------------------------------------------------------------|-----------|-------|------------------------------|
|                | <i>Piper demeraranum</i> (Miq.) C.DC.                            | 8261      | IF    | CAY                          |
|                | <i>Piper demeraranum</i> (Miq.) C.DC.                            | 8030      | IF    | CAY, BBS                     |
|                | <i>Piper hispidum</i> Sw.                                        | 8088      | MF    | CAY, L, HUA, BBS             |
|                | <i>Piper hosmannianum</i> (Miq.) C.DC.                           | 8087      | MF    | CAY, L, HUA, BBS             |
|                | <i>Piper humistratum</i> Görts & K.U.Kramer                      | 8260      | IF    | CAY                          |
|                | <i>Piper cf. pulleanum</i> Yunck.                                | 8139      | IF    | CAY                          |
|                | <i>Piper trichoneuron</i> (Miq.) C.DC.                           | NC        | IF    |                              |
|                | <i>Piper</i> sp.                                                 | NC        | IF    |                              |
| PLANTAGINACEAE | <i>Scoparia dulcis</i> L.                                        | 8157      | MF    | CAY, L, US, NY, BBS          |
| POACEAE        | <i>Ichnanthus nemoralis</i> (Schrad. ex Schult.) Hitchc. & Chase | 8117      | IF    | CAY, L, MO                   |
|                | <i>Ichnanthus panicoides</i> P.Beauv.                            | 8014      | MF    | CAY, L, BBS                  |
|                | <i>Ichnanthus panicoides</i> P.Beauv.                            | NC        | IF    |                              |
|                | <i>Panicum cf. miliaceum</i> L. (introduced?)                    | 8445      | LXF   | CAY, BBS                     |
|                | <i>Parodiolyra micrantha</i> (Kunth) Davidse & Zuloaga           | NC        | MF/IF |                              |
|                | <i>Pharus latifolius</i> L.                                      | 8207      | IF    | CAY                          |
|                | <i>Pharus parvifolius</i> Nash ssp. <i>parvifolius</i>           | 8208      | IF    | CAY, L, BBS                  |
|                | <i>Piresia goeldii</i> Swallen                                   | NC        | IF    |                              |
| PODOSTEMACEAE  | <i>Mourera fluviatilis</i> Aubl.                                 | 8196      | A     | CAY, P, BBS                  |
|                | <i>Rhyncholacis guyanensis</i> P.Royen                           | 8002      | A     | CAY                          |
|                | <i>Rhyncholacis guyanensis</i> P.Royen                           | 8003      | A     | CAY                          |
|                | <i>Rhyncholacis guyanensis</i> P.Royen                           | 8197      | MF    | CAY, L, US, BBS              |
| POLYGALACEAE   | <i>Securidace cf. paniculata</i> Rich.                           | 8491 B    | IF    | CAY-BBS-L-K-NY               |
| POLYGONACEAE   | <i>Coccoloba excelsa</i> Benth.                                  | 8228      | LXF   | CAY, L, K, AAU, BBS          |
|                | <i>Coccoloba excelsa</i> Benth.                                  | 8585      |       | CAY, BBS                     |
|                | <i>Coccoloba cf. excelsa</i> Benth.                              | 8546      | LXF   | CAY, BBS                     |
|                | <i>Coccoloba cf. excelsa</i> Benth.                              | 8341      | MF    | CAY, BBS, L, AAU             |
|                | <i>Coccoloba cf. excelsa</i> Benth.                              | 8607      | DXT   | CAY, BBS, MO                 |
|                | <b><i>Coccoloba</i> sp. 1</b>                                    | 8381      | DXT   | CAY                          |
|                | <i>Coccoloba</i> sp. 2                                           | 8616      | DXT   | CAY, BBS, MO                 |
| PRIMULACEAE    | <i>Clavija lancifolia</i> Desf. ssp. <i>lancifolia</i>           | 8147      | IF    | CAY, L, BBS                  |
|                | <i>Cybianthus cf. penduliflorus</i> Mart.                        | 8505      | IF    | CAY, BBS, FTG                |
| PROTEACEAE     | <i>Panopsis sessilifolia</i> (Rich.) Sandwith                    | 8151      | MF    | CAY                          |
| PUTRANJIVACEAE | <i>Drypetes variabilis</i> Uittien                               | NC        | IF/MF |                              |
| RHAMNACEAE     | <i>Gouania blanchetiana</i> Miq.                                 | 8248      | LXF   | CAY, L, K, NY, MO, BBS       |
| RHIZOPHORACEAE | <i>Cassipourea guianensis</i> Aubl.                              | 8185      | LXF   | CAY, L, K, B, NY, BBS        |
|                | <i>Cassipourea guianensis</i> Aubl.                              | 8283      | MF    | CAY, L, K, NY, BBS           |
| RUBIACEAE      | <i>Chiococca alba</i> (L.) Hitchc.                               | 8337      | MF    | CAY, BBS, L, P, K, B, NY, MO |
|                | <i>Chiococca alba</i> (L.) Hitchc.                               | 8096      | MF    | CAY, L, MO, BR, BBS          |
|                | <i>Chiococca alba</i> (L.) Hitchc.                               | 8584      | DXT   | CAY, BBS, UFG                |
|                | <i>Chiococca nitida</i> Benth.                                   | 8377      | DXT   | CAY, BBS, MO, UFG            |
|                | <i>Chomelia malaneoides</i> Müll.Arg.                            | 8417      | LXF   | CAY, BBS, MO, UFG            |
|                | <i>Coussarea micrococca</i> Bremek.                              | 8351      | SV    | CAY, BBS, L, MO              |
|                | <i>Coussarea</i> sp.                                             | 8606      | DXT   | CAY, BBS, MO                 |
|                | <i>Coutarea hexandra</i> (Jacq.) K.Schum.                        | 8531      | MF    | CAY, BBS, L, P               |
|                | <i>Duroia aquatica</i> (Aubl.) Bremek.                           | NC        | IF    |                              |
|                | <i>Duroia eriopila</i> L.f.                                      | 8234      | LXF   | CAY                          |



APPENDIX *Continued*

| Family | Taxon                                                                                       | Coll. No. | Veg. | Herbaria               |
|--------|---------------------------------------------------------------------------------------------|-----------|------|------------------------|
|        | <i>Duroia</i> cf. <i>eriopila</i> L.f.                                                      | NC        | IF   |                        |
|        | <i>Faramea quadricostata</i> Bremek. emend. Steyererm.                                      | 8023      | LXF  | CAY, L, MO, BBS        |
|        | <i>Faramea quadricostata</i> Bremek. emend. Steyererm.                                      | 8221      | LXF  | CAY                    |
|        | <i>Faramea quadricostata</i> Bremek. emend. Steyererm.                                      | NC        | MF   |                        |
|        | <i>Faramea sessilifolia</i> (Kunth) DC.                                                     | 8245      | LXF  | CAY                    |
|        | <i>Faramea sessilifolia</i> (Kunth)DC.                                                      | 8605      | DXT  | CAY, BBS, MO           |
|        | <i>Genipa spruceana</i> Steyererm.                                                          | 8110      | IF   | CAY, L, BBS            |
|        | <i>Gonzalagunia dicocca</i> Cham. & Schltdl..                                               | 8297      | IF   | CAY, L, BR, MO, BBS    |
|        | <i>Guettarda argentea</i> Lam.                                                              | 8566      | LXF  | CAY, BBS, MO           |
|        | <i>Guettarda spruceana</i> Müll.Arg.                                                        | 8415      | DXT  | CAY, BBS               |
|        | cf. <i>Guettarda</i> sp.?                                                                   | 8355      | LXF  | CAY, BBS, MO           |
|        | <i>Ixora graciliflora</i> Benth.                                                            | 8076      | LXF  | CAY, L, MO, BBS        |
|        | <i>Ixora graciliflora</i> Benth.                                                            | 8230      | LXF  | CAY, L, B, BR, MO, BBS |
|        | <i>Ixora graciliflora</i> Benth.                                                            | 8239      | MF   | CAY, L, B, BR, MO, BBS |
|        | <i>Ixora graciliflora</i> Benth.                                                            | 8412      | DXT  | CAY, BBS               |
|        | <i>Ixora graciliflora</i> Benth.                                                            | 8574      | LXF  | CAY, BBS, MO           |
|        | <i>Ixora</i> sp.                                                                            | 8126      | MF   | CAY, MO, BBS           |
|        | <i>Manettia alba</i> (Aubl.) Wernham                                                        | 8320      | MF   | CAY, BBS, L, MO        |
|        | <i>Margaritopsis guianensis</i> (Bremek.) C.M. Taylor                                       | 8575      | LXF  | CAY, BBS               |
|        | <i>Morinda</i> cf. <i>brachycalix</i> (Bremek.) Steyererm.                                  | 8051      | MF   | CAY, BBS               |
|        | <i>Morinda surinamensis</i> (Bremek.) Steyererm.                                            | 8282      | MF   | CAY, BBS               |
|        | <i>Morinda tenuiflora</i> (Benth.) Steyererm.                                               | 8424      | LXF  | CAY                    |
|        | cf. <i>Pagamea</i> sp.                                                                      | 8078      | LXF  | CAY, L, BR, MO, BBS    |
|        | <i>Palicourea</i> cf. <i>amapaensis</i> Steyererm.                                          | 8527 B    | MF   | CAY, BBS               |
|        | <i>Palicourea crocea</i> (Sw.) Roem. & Schult.                                              | 8188      | LXF  | CAY, L, K, NY, MO, BBS |
|        | <i>Palicourea croceoides</i> Desv ex Ham.                                                   | 8019      | LXF  | CAY                    |
|        | <i>Palicourea guianensis</i> Aubl.                                                          | NC        | MF   |                        |
|        | <i>Posoqueria latifolia</i> (Rudge) Roem. & Schult. ssp. <i>gracilis</i> (Rudge) Steyererm. | 8532      | MF   | CAY, BBS, L, UFG       |
|        | <i>Posoqueria latifolia</i> (Rudge) Roem. & Schult. ssp. <i>latifolia</i>                   | 8041      | IF   | CAY, BBS               |
|        | <i>Posoqueria latifolia</i> (Rudge) Roem. & Schult. ssp. <i>latifolia</i>                   | 8121      | IF   | CAY, BBS               |
|        | <i>Psychotria apoda</i> Steyererm.                                                          | 8017      | MF   | CAY, BBS               |
|        | <i>Psychotria apoda</i> Steyererm.                                                          | NC        | IF   |                        |
|        | <i>Psychotria bracteocardia</i> (DC.) Müll.Arg.                                             | 8345      | SV   | CAY, BBS               |
|        | <i>Psychotria bracteocardia</i> (DC.) Müll.Arg.                                             | 8541      | LXF  | CAY, BBS, MO, UFG      |
|        | <i>Psychotria</i> cf. <i>carthagenensis</i> Jacq.                                           | 8347      | MF-B | CAY, BBS, L, MO        |
|        | <i>Psychotria hoffmannseggiana</i> (Willd. ex Roem. & Schult.) Müll.Arg.                    | 8374      | DXT  | CAY, BBS, L, MO        |
|        | <i>Psychotria iodotricha</i> Müll.Arg.                                                      | 8025      | LXF  | CAY, BBS               |
|        | <i>Psychotria iodotricha</i> Müll.Arg.                                                      | 8529      | MF   | CAY, BBS               |
|        | <i>Psychotria kappleri</i> (Miq.) Müll.Arg. ex Benoist.                                     | 8331      | MF   | CAY, BBS               |

APPENDIX *Continued*

| Family                                             | Taxon                                                            | Coll. No.                            | Veg.  | Herbaria               |
|----------------------------------------------------|------------------------------------------------------------------|--------------------------------------|-------|------------------------|
| RUTACEAE                                           | <i>Psychotria moroidea</i> Steyerem.                             | 8013                                 | MF    | CAY, L, NY, MO, BBS    |
|                                                    | <i>Psychotria moroidea</i> Steyerem.                             | 8184                                 | LXF   | CAY, L, MO, BBS        |
|                                                    | <i>Psychotria muscosa</i> (Jacq.) Steyerem.                      | 8119                                 | IF    | CAY, MO, BBS           |
|                                                    | <i>Psychotria muscosa</i> (Jacq.) Steyerem.                      | 8143                                 | IF    | CAY, L, BR, MO, BBS    |
|                                                    | <i>Psychotria muscosa</i> (Jacq.) Steyerem.                      | 8526 B                               | MF    | CAY, BBS, MO, UFG      |
|                                                    | <i>Psychotria racemosa</i> Rich.                                 | 8399                                 | LHF   | CAY, BBS, MO           |
|                                                    | <i>Psychotria</i> sp.                                            | 8213                                 | IF    | CAY                    |
|                                                    | <b><i>Rudgea crassiloba</i></b> (Benth.) B.L.Rob.                | 8365                                 | DXT   | CAY, BBS, P, MO        |
|                                                    | cf. <i>Rudgea</i> sp.                                            | 8619                                 | DXT   | CAY, BBS               |
|                                                    | Genus indet.                                                     | 8271                                 | MF-B  | CAY, BBS               |
|                                                    | <i>Conchocarpus heterophyllus</i> (A.St.-Hil.) Kallunki & Pirani | 8252                                 | MF-B  | CAY, L, K, NY, MO, BBS |
|                                                    | <i>Conchocarpus heterophyllus</i> (A.St.-Hil.) Kallunki & Pirani | 8336                                 | MF-B  | CAY                    |
|                                                    | <i>Erythrochiton brasiliensis</i> Nees & Mart.                   | 8486                                 | MF    | CAY, BBS, L, B, NY     |
|                                                    | <i>Esenbeckia</i> cf. <i>pilocarpoides</i> Kunth                 | 8338                                 | MF-B  | CAY, BBS, L            |
|                                                    | <i>Esenbeckia</i> cf. <i>pilocarpoides</i> Kunth                 | 8254                                 | MF-B  | CAY, L, K, NY, MO, BBS |
|                                                    | <i>Pilocarpus microphyllus</i> Stapf ex Wardleworth              | 8219                                 | LXF   | CAY, BBS               |
|                                                    | <i>Pilocarpus microphyllus</i> Stapf. ex Wardleworth             | 8536                                 | LXF   | CAY, BBS               |
|                                                    | <i>Ticorea foetida</i> Aubl.                                     | 8045                                 | MF    | CAY, L, NY, BBS        |
|                                                    | <i>Ticorea foetida</i> Aubl.                                     | NC                                   | IF    |                        |
|                                                    | <i>Ticorea foetida</i> Aubl.                                     | NC                                   | MF-B  |                        |
|                                                    | <i>Zanthoxylum</i> cf. <i>apiculatum</i> (Sandwith) P.G.Waterman | 8010                                 | MF    | CAY, BBS               |
| <i>Zanthoxylum</i> sp. 2                           | NC                                                               | MF                                   |       |                        |
| SALICACEAE                                         | <i>Casearia</i> cf. <i>combaymensis</i> Tul.                     | 8625                                 | MF    | CAY, BBS, MO           |
|                                                    | <i>Casearia decandra</i> Jacq.                                   | 8366                                 | DXT   | CAY, BBS, MO           |
|                                                    | <i>Casearia</i> aff. <i>decandra</i> Jacq.                       | 8475                                 | LXF   | CAY, BBS, MO           |
|                                                    | <i>Casearia</i> cf. <i>javitensis</i> Kunth.                     | 8346                                 | MF    | CAY, BBS               |
|                                                    | <i>Casearia</i> aff. <i>mariquitensis</i> Kunth                  | 8375                                 | DXT   | CAY, BBS, K, MO        |
|                                                    | <i>Casearia negrensis</i> Eichler                                | 8240                                 | MF    | FC                     |
|                                                    | <i>Casearia</i> aff. <i>prunifolia</i> Kunth?                    | 8329                                 | MF    | CAY, BBS, MO           |
|                                                    | <i>Xylosma benthamii</i> (Tul.) Triana & Planch.                 | 8561                                 |       | CAY, BBS               |
|                                                    | <i>Xylosma</i> sp.                                               | NC                                   | MF    |                        |
|                                                    | SANTALACEAE                                                      | <i>Phoradendron northropiae</i> Urb. | 8304  | MF                     |
| <b><i>Phoradendron strongyloclados</i></b> Eichler |                                                                  | 8599                                 | DXT   | CAY, BBS, P, L, UVIC   |
| SAPINDACEAE                                        | <i>Cupania</i> aff. <i>diphylla</i> Vahl                         | 8189                                 | LXF   | CAY, L, K, NY, US, BBS |
|                                                    | <i>Cupania hirsuta</i> Radlk.                                    | NC                                   | MF/IF |                        |
|                                                    | <i>Cupania rubiginosa</i> (Poir.) Radlk.                         | 8455                                 | LXF   | CAY, BBS, L, P, US     |
|                                                    | <i>Cupania rubiginosa</i> (Poir.) Radlk.                         | 8627                                 | LXF   | CAY, BBS, US           |
|                                                    | <i>Paullinia acuminata</i> Uttien                                | 8183                                 | LXF   | CAY, BBS               |
|                                                    | <i>Paullinia alata</i> (Ruiz & Pav.) G.Don                       | 8212                                 | IF    | CAY, L, BBS            |
|                                                    | <i>Paullinia anodonta</i> Radlk.                                 | 8507                                 | SV    | CAY, BBS, US           |
|                                                    | <i>Paullinia latifolia</i> Benth. ex Radlk.                      | 8506 B                               | SV    | CAY, BBS, US           |
|                                                    | <i>Paullinia plagioptera</i> Radlk.                              | 8077                                 | LXF   | CAY, L, K, US, NY, BBS |
|                                                    | <i>Paullinia plagioptera</i> Radlk.                              | 8578                                 | LXF   | CAY, BBS, US           |
|                                                    | <i>Paullinia stellata</i> Radlk.                                 | 8335                                 | MF    | CAY, BBS               |

APPENDIX *Continued*

| Family        | Taxon                                                                      | Coll. No. | Veg.  | Herbaria                |
|---------------|----------------------------------------------------------------------------|-----------|-------|-------------------------|
|               | <i>Pseudima frutescens</i> (Aubl.) Radlk.                                  | 8131      | MF    | CAY, L, US, BBS         |
|               | <i>Talisia guianensis</i> Aubl.                                            | 8342      | MF    | CAY, BBS                |
|               | <i>Talisia guianensis</i> Aubl.                                            | 8588      | SV    | CAY, BBS, US            |
|               | <i>Talisia</i> aff. <i>guianensis</i> Aubl.                                | 8425      | LXF   | CAY                     |
|               | <i>Talisia macrophylla</i> (Mart.) Radlk.                                  | 8061      | MF    | CAY                     |
|               | <i>Talisia macrophylla</i> (Mart.) Radlk.                                  | 8340      | MF    | CAY, BBS                |
|               | <i>Talisia macrophylla</i> (Mart.) Radlk.                                  | 8391      | LF    | CAY, BBS, US            |
|               | <i>Talisia mollis</i> Kunth ex Cambess.                                    | 8071      | MF    | CAY, US, BBS            |
|               | <i>Talisia pilosula</i> Sagot ex Radlk.                                    | 8232      | LXF   | CAY, L, BBS             |
|               | <i>Talisia</i> sp.                                                         | 8247      | LXF   | CAY, BBS                |
| SAPOTACEAE    | <i>Manilkara bidentata</i> (A.DC.) A.Chev.                                 | NC        | MF    |                         |
|               | <b><i>Pouteria</i></b> aff. <b><i>sagotiana</i></b> (Baill.) Eyma          | 8360      | SV    | CAY, BBS, K             |
|               | <b><i>Pouteria</i></b> cf. <b><i>sagotiana</i></b> (Baill.) Eyma           | NC        | MF    |                         |
|               | <i>Pouteria</i> sp.                                                        | 8266      | IF    | CAY                     |
|               | <i>Pouteria</i> sp.                                                        | NC        | MF    |                         |
|               | Genus indet.                                                               | 8450      | LXF   | CAY, BBS                |
| SIMAROUBACEAE | <i>Simaba guianensis</i> Aubl. ssp. <i>guianensis</i>                      | 8128      | MF    | CAY, L, BBS             |
|               | <i>Simaba guianensis</i> Aubl. ssp. <i>guianensis</i>                      | 8132      | IF    | CAY, L, BBS             |
|               | <i>Simaba guianensis</i> Aubl. ssp. <i>guianensis</i>                      | 8224      | LXF   | CAY, BBS                |
| SIPARUNACEAE  | <i>Siparuna decipiens</i> (Tul.) A.DC.                                     | 8214      | IF    | CAY, L, P, BBS          |
|               | <i>Siparuna guianensis</i> Aubl.                                           | 8050      | MF    | CAY, P, L, BBS          |
|               | <i>Siparuna guianensis</i> Aubl.                                           | 8238      | MF    | CAY, L, P, NY, BBS      |
| SMILACACEAE   | <i>Smilax lasseriana</i> Steyerem.                                         | 8603      | DXT   | CAY, BBS, B             |
|               | <i>Smilax staminea</i> Griseb.                                             | 8408      | DXT   | CAY, BBS, B, MO         |
|               | <i>Smilax</i> sp.                                                          | 8012      | MF    | CAY, BBS                |
| SOLANACEAE    | <i>Cestrum schlechtendalii</i> G.Don                                       | 8284      | IF    | CAY, L, K, NY, BBS      |
|               | <b><i>Solanum</i></b> aff. <b><i>adhaerens</i></b> Roem. & Schult.         | 8404      | LXF   | CAY, BBS                |
|               | <i>Solanum asperum</i> . Rich.                                             | 8094      | MF    | CAY, L, NY, BBS         |
|               | <i>Solanum velutinum</i> Dunal                                             | 8427      | LXF   | CAY, BBS                |
| THURNIACEAE   | <i>Thurnia sphaerocephala</i> (Rudge) Hook.f.                              | NC        | A     |                         |
| TRIGONIACEAE  | <i>Trigonia microcarpa</i> Sagot ex Warm.                                  | 8484      | LXF   | CAY, BBS                |
|               | <i>Trigonia microcarpa</i> Sagot ex Warm.                                  | 8048      | MF    | CAY, L, K, MO, US, BBS  |
| URTICACEAE    | <b><i>Urera baccifera</i></b> (L.) Gaudich. ex Wedd.                       | 8586-A    | SV    | CAY, BBS, BG            |
| VERBENACEAE   | <i>Petrea volubilis</i> L.                                                 | 8047      | MF    | CAY, L, BBS             |
|               | <i>Petrea</i> cf. <i>volubilis</i> L.                                      | NC        | IF    |                         |
| VIOLACEAE     | <i>Amphirrhox longifolia</i> (A.St-Hil.) Spreng.                           | 8562      | MF    | CAY, BBS, BHO           |
|               | <i>Paypayrola hulkiana</i> Pulle                                           | 8011      | MF    | CAY, L, BHO, BBS        |
|               | <i>Paypayrola</i> cf. <i>hulkiana</i> Pulle.                               | NC        | IF/MF |                         |
|               | <i>Paypayrola</i> sp.                                                      | 8055      | MF    | CAY                     |
|               | <i>Rinorea neglecta</i> Sandwith                                           | 8471      | MF    | CAY, BBS, BHO           |
|               | <i>Rinorea pubiflora</i> (Benth.) Sprague & Sandwith                       | 8218      | IF    | CAY, L, K, NY, BHO, BBS |
|               | <i>Rinorea pubiflora</i> (Benth.) Sprague & Sandwith                       | 8289      | IF    | CAY, BHO, BBS           |
|               | <i>Rinorea pubiflora</i> (Benth.) Sprague & Sandwith var. <i>pubiflora</i> | 8191      | LXF   | CAY, L, BHO, BBS        |
|               | <i>Rinorea pubiflora</i> (Benth.) Sprague & Sandwith                       | 8589      | SV    | CAY, BBS, BHO           |
|               | <i>Rinorea</i> aff. <i>pubiflora</i> (Benth.) Sprague & Sandwith           | 8255      | MF-B  | CAY, BBS                |
|               | <i>Rinorea</i> cf. <i>pubiflora</i> (Benth.) Sprague & Sandwith            | NC        | IF    |                         |

APPENDIX *Continued*

| Family        | Taxon                                                              | Coll. No. | Veg. | Herbaria            |
|---------------|--------------------------------------------------------------------|-----------|------|---------------------|
|               | <i>Rinorea</i> aff. <i>pubiflora</i> ('Benth.') Sprague & Sandwith | 8569      | MF-B | CAY, BBS, BHO       |
|               | <i>Rinorea riana</i> Kuntze                                        | 8062      | MF   | CAY, BHO, BBS       |
|               | <i>Rinorea riana</i> Kuntze                                        | 8155      | MF   | CAY, P, L, BHO, BBS |
|               | <i>Rinorea riana</i> Kuntze                                        | 8227      | LXF  | CAY, BHO, BBS       |
|               | <i>Rinorea</i> cf. <i>riana</i> Kuntze                             | NC        | MF   |                     |
|               | <i>Rinorea</i> cf. <i>riana</i> Kuntze                             | NC        | MF-B |                     |
| VITACEAE      | <i>Cissus haematantha</i> Miq.                                     | 8026      | LXF  | CAY, BBS            |
|               | <i>Cissus verticillata</i> (L.) Nicolson & C.E.Jarvis              | 8080      | LXF  | CAY, L, BHCB, BBS   |
|               | <i>Cissus verticillata</i> (L.) Nicolson & C.E.Jarvis              | 8466      | SV   | CAY, BBS, HRCB      |
| VOCHYSIACEAE  | <i>Ruizterania albiflora</i> (Warm.) Marc.-Berti                   | NC        | MF   |                     |
| ZINGIBERACEAE | <i>Renelamia guianensis</i> Maas                                   | 8288      | IF   | CAY                 |
|               | <i>Renelamia guianensis</i> Maas                                   | NC        | MF   |                     |
|               | <i>Renelamia</i> sp.                                               | NC        | MF-B |                     |
| INDET FAMILY  | Species indet.                                                     | 8549      | IF   | CAY                 |

2. BRYOPHYTA

| Family           | Taxon          | Coll. No. | Veg. | Herbaria |
|------------------|----------------|-----------|------|----------|
| BRYOPHYTA indet. | Species indet. | 8148      | A    | CAY      |

3. PTERIDOPHYTA

| Family           | Taxon                                                                                                           | Coll. No. | Veg.   | Herbaria    |
|------------------|-----------------------------------------------------------------------------------------------------------------|-----------|--------|-------------|
| ASPLENIACEAE     | <i>Asplenium serratum</i> L.                                                                                    | 8164      | IF     | CAY, L, BBS |
| CYATHEACEAE      | <i>Cyathea pungens</i> (Willd.) Domin                                                                           | 8461      | IF     | CAY, BBS, P |
| DRYOPTERIDACEAE  | <i>Bolbitis semipinnatifida</i> (Fée) Alston                                                                    | NC        | IF/ MF |             |
|                  | <i>Bolbitis semipinnatifida</i> (Fée) Alston                                                                    | 8169      | IF     | CAY, L, BBS |
|                  | <i>Cyclodium inerme</i> (Fée) A.R.Sm.                                                                           | NC        | MF/IF  |             |
|                  | <i>Cyclodium meniscioides</i> (Willd.) C.Presl. var. <i>meniscioides</i>                                        | 8033      | IF     | CAY, L, BBS |
|                  | <i>Elaphoglossum glabellum</i> J.Sm.                                                                            | 8443      | LXF    | CAY, BBS    |
|                  | <i>Elaphoglossum luridum</i> (Fée) H.Christ                                                                     | 8593      | DXT    | CAY, BBS    |
|                  | <b><i>Elaphoglossum plumosum</i></b> (Fée) T.Moore                                                              | 8439      | LXF    | CAY         |
|                  | <i>Lastreopsis effusa</i> (Sw.) Tindale var. <i>divergens</i> (Willd. ex Schkuhr) Proctor                       | 8210      | IF     | CAY         |
|                  | <i>Polybotrya caudata</i> Kunze                                                                                 | 8462      | IF     | CAY, BBS    |
| HYMENOPHYLLACEAE | <i>Hymenophyllum decurrens</i> (Jacq.) Sw.                                                                      | 8611      | DXT    | CAY, BBS    |
|                  | <i>Hymenophyllum polyanthos</i> (Sw.) Sw.                                                                       | 8612      | DXT    | CAY, BBS    |
|                  | <i>Trichomanes pedicellatum</i> Desv.                                                                           | 8135      | IF     | CAY, BBS    |
|                  | <i>Trichomanes pinnatum</i> Hedw.                                                                               | 8281      | IF     | CAY         |
|                  | <i>Trichomanes pinnatum</i> Hedw.                                                                               | 8530      | MF     | CAY         |
| LINDSAEACEAE     | <i>Lindsaea lancea</i> (L.) Bedd. var. <i>falcata</i> (Dryand.) Rosenst.                                        | 8100      | IF     | CAY, L, BBS |
| LOMARIOPSIDACEAE | <i>Lomariopsis prieuriana</i> Fée                                                                               | NC        | IF/MF  |             |
| LYCOPODIACEAE    | <b><i>Huperzia linifolia</i></b> (L.) Trevis. var. <i>jenmanii</i> (Underw. & F.E.Lloyd) B.Øllg. & P.G.Windisch | 8623      | DXT    | CAY, BBS    |
| METAXYACEAE      | <i>Metaxya rostrata</i> (Kunth) C.Presl                                                                         | NC        | MF     |             |



APPENDIX *Continued*

| Family           | Taxon                                                                | Coll. No.                          | Veg. | Herbaria              |
|------------------|----------------------------------------------------------------------|------------------------------------|------|-----------------------|
| POLYPODIACEAE    | <i>Campyloneurum phyllitidis</i> (L.) C.Presl                        | 8592                               | DXT  | CAY, BBS, P           |
|                  | <i>Dicranoglossum desvauxii</i> (Klotzsch) Proctor                   | 8246                               | LXF  | CAY, BBS              |
|                  | <i>Pecluma pectinata</i> (L.) M.G.Price                              | 8622                               | MF   | CAY, BBS              |
|                  | <i>Pecluma plumula</i> (Humb. & Bonpl. ex Willd.)<br>M.G.Price       | 8595                               | DXT  | CAY, BBS              |
| PTERIDACEAE      | <i>Pleopeltis percussa</i> (Cav.) Hook. & Grev.                      | 8591                               | DXT  | CAY, BBS, P           |
|                  | <i>Adiantum argutum</i> Splitg.                                      | 8509                               | IF   | CAY                   |
|                  | <i>Adiantum argutum</i> Splitg.                                      | 8211                               | IF   | CAY, L, P,<br>UC, BBS |
|                  | <i>Adiantum cajennense</i> Willd. ex Klotzsch                        | 8300                               | IF   | CAY, BBS              |
|                  | <i>Adiantum</i> cf. <i>cajennense</i> Willd. ex Klotzsch             | 8074                               | MF   | CAY, BBS              |
|                  | <i>Adiantum fuliginosum</i> Fée                                      | 8024                               | MF   | CAY, L, BBS           |
|                  | <i>Adiantum paraense</i> Hieron.                                     | 8138                               | IF   | CAY-BBS               |
|                  | <i>Adiantum phyllitidis</i> J.Sm.                                    | 8258                               | IF   | CAY, L, P,<br>UC, BBS |
|                  | <i>Adiantum terminatum</i> Kunze ex Miq.                             | 8285                               | MF   | CAY, BBS              |
|                  | <i>Pityrogramma calomelanos</i> (L.) Link var.<br><i>calomelanos</i> | 8113                               | IF   | CAY, L, BBS           |
|                  | SCHIZAEACEAE                                                         | <i>Schizaea elegans</i> (Vahl) Sw. | 8257 | MF                    |
| SELAGINELLACEAE  | <b><i>Selaginella</i> cf. <i>erythropus</i></b> (Mart.) Spring       | 8359                               | FR   | CAY, BBS              |
|                  | <i>Selaginella parkeri</i> (Hook. & Grev.) Spring                    | 8101                               | IF   | CAY, L, P,<br>BBS     |
|                  | <i>Selaginella parkeri</i> (Hook. & Grev.) Spring                    | 8286                               | IF   | CAY, BBS              |
|                  | <b><i>Selaginella suavis</i></b> (Spring) Spring                     | 8587                               | MF   | CAY, BBS              |
| TECTARIACEAE     | <i>Selaginella</i> sp.                                               | NC                                 | IF   |                       |
|                  | <b><i>Cyclopeltis semicordata</i></b> (Sw.) J.Sm.                    | 8590                               | SV   | CAY, BBS              |
|                  | <i>Dracoglossum sinuatum</i> (Fée) Christenh.                        | 8032                               | IF   | CAY, P, L,<br>BBS     |
|                  | <i>Tectaria incisa</i> Cav.                                          | 8485                               | MF   | CAY, BBS              |
|                  | <i>Tectaria trifoliata</i> (L.) Cav.                                 | 8067                               | IF   | CAY, BBS              |
|                  | <i>Triplophyllum</i> cf. <i>dicksonioides</i> (Fée) Holttum          | 8136                               | IF   | CAY                   |
| THELYPTERIDACEAE | <i>Triplophyllum</i> sp.                                             | NC                                 | MF   |                       |
|                  | <i>Thelypteris opulenta</i> (Kaulf.) Fosberg                         | 8112                               | IF   | CAY, P, BBS           |
|                  | <i>Thelypteris poiteana</i> (Bory) Proctor                           | 8209                               | IF   | CAY                   |

Coll. No. (Collectors Bordenave & Granville): NC, not collected. Veg. (Vegetation type): A, aquatic (stream) vegetation; DXT, dwarf meso-xeric thicket; IF, inundated forest; LXF, low meso-xeric forest; MF, mesic forest; MF-B, *Buxus citrifolia* forest; SV, secondary vegetation. Bold type indicates species of concern for conservation.
